# Supplementary material
Source: PubMed Central journal article supplement (PMC5984119)
Supplement: NIHMS946034-supplement.pdf [file NIHMS946034-supplement.pdf]

## Supplementary Data

### **Cytotoxic homoisoflavonoids from the bulbs of *Bellevalia flexuosa***

Tamam El-Elimat<sup>a,\*</sup>, José Rivera-Chávez<sup>b</sup>, Joanna E. Burdette<sup>c</sup>, Austin Czarnecki<sup>c</sup>, Maram B. Alhawarri<sup>a</sup>,  
Mohammad Al-Gharaibeh<sup>d</sup>, Feras Alali<sup>e,\*\*</sup>, and Nicholas H. Oberlies<sup>b</sup>

Department of Medicinal Chemistry and Pharmacognosy, Faculty of Pharmacy, Jordan University of Science and Technology, Irbid 22110, Jordan

Department of Chemistry and Biochemistry, University of North Carolina at Greensboro, Greensboro, North Carolina 27402, United States

Department of Medicinal Chemistry and Pharmacognosy, College of Pharmacy, University of Illinois at Chicago, Chicago, Illinois 60612, United States

Department of Natural Resources and Environment, Faculty of Agriculture, Jordan University of Science and Technology, Irbid 22110, Jordan

Faculty of Pharmacy, Qatar University, Doha 2713, Qatar

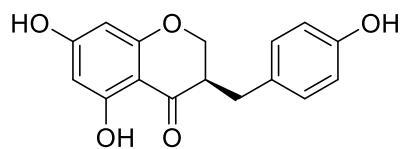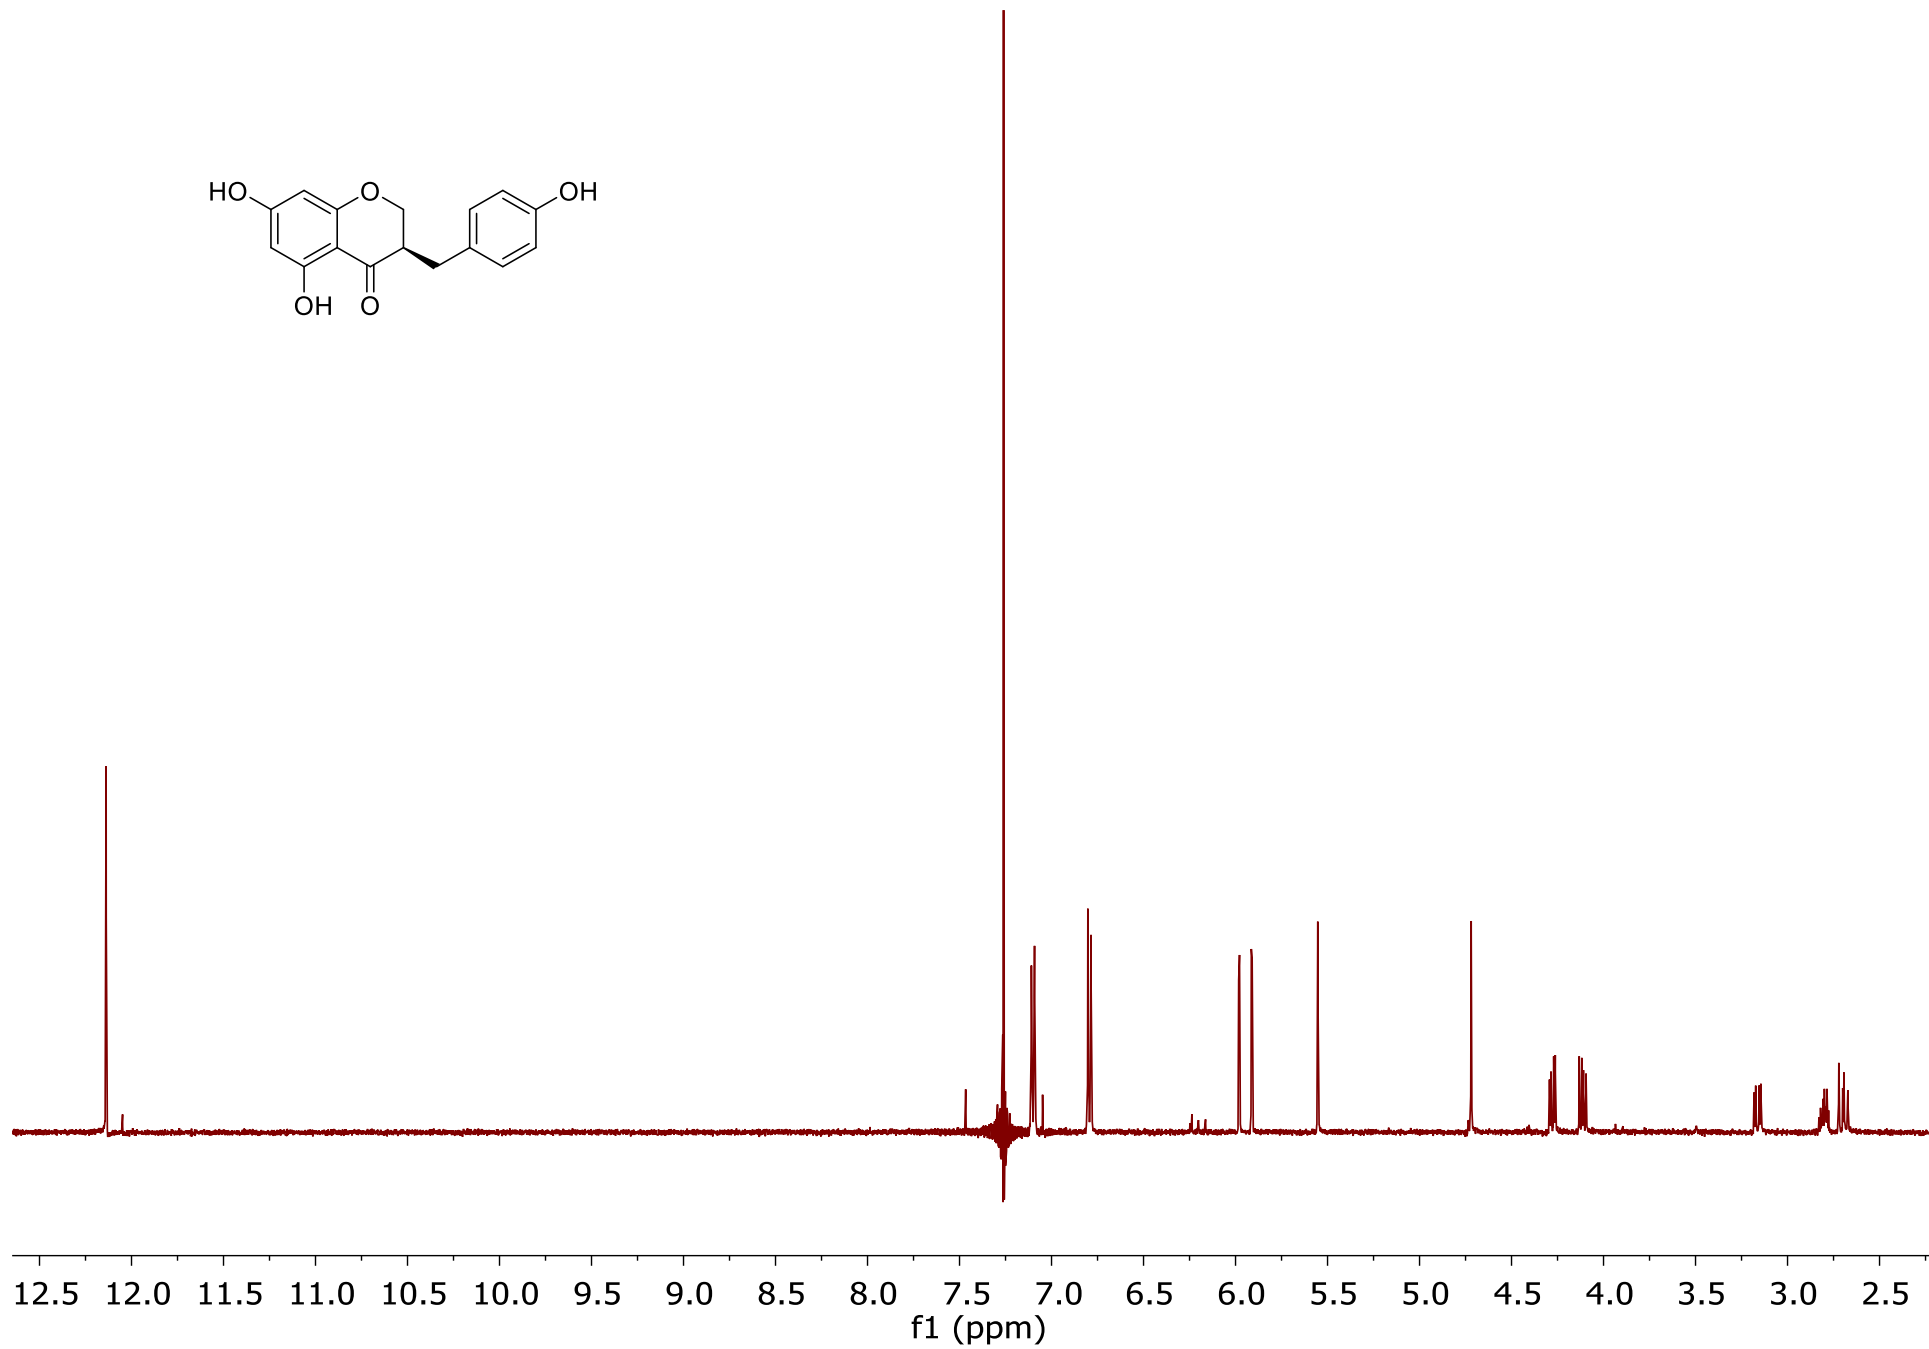

**Figure S1.** <sup>1</sup>H NMR spectrum of compound **1** [500 MHz, CDCl<sub>3</sub>].

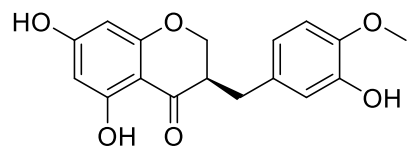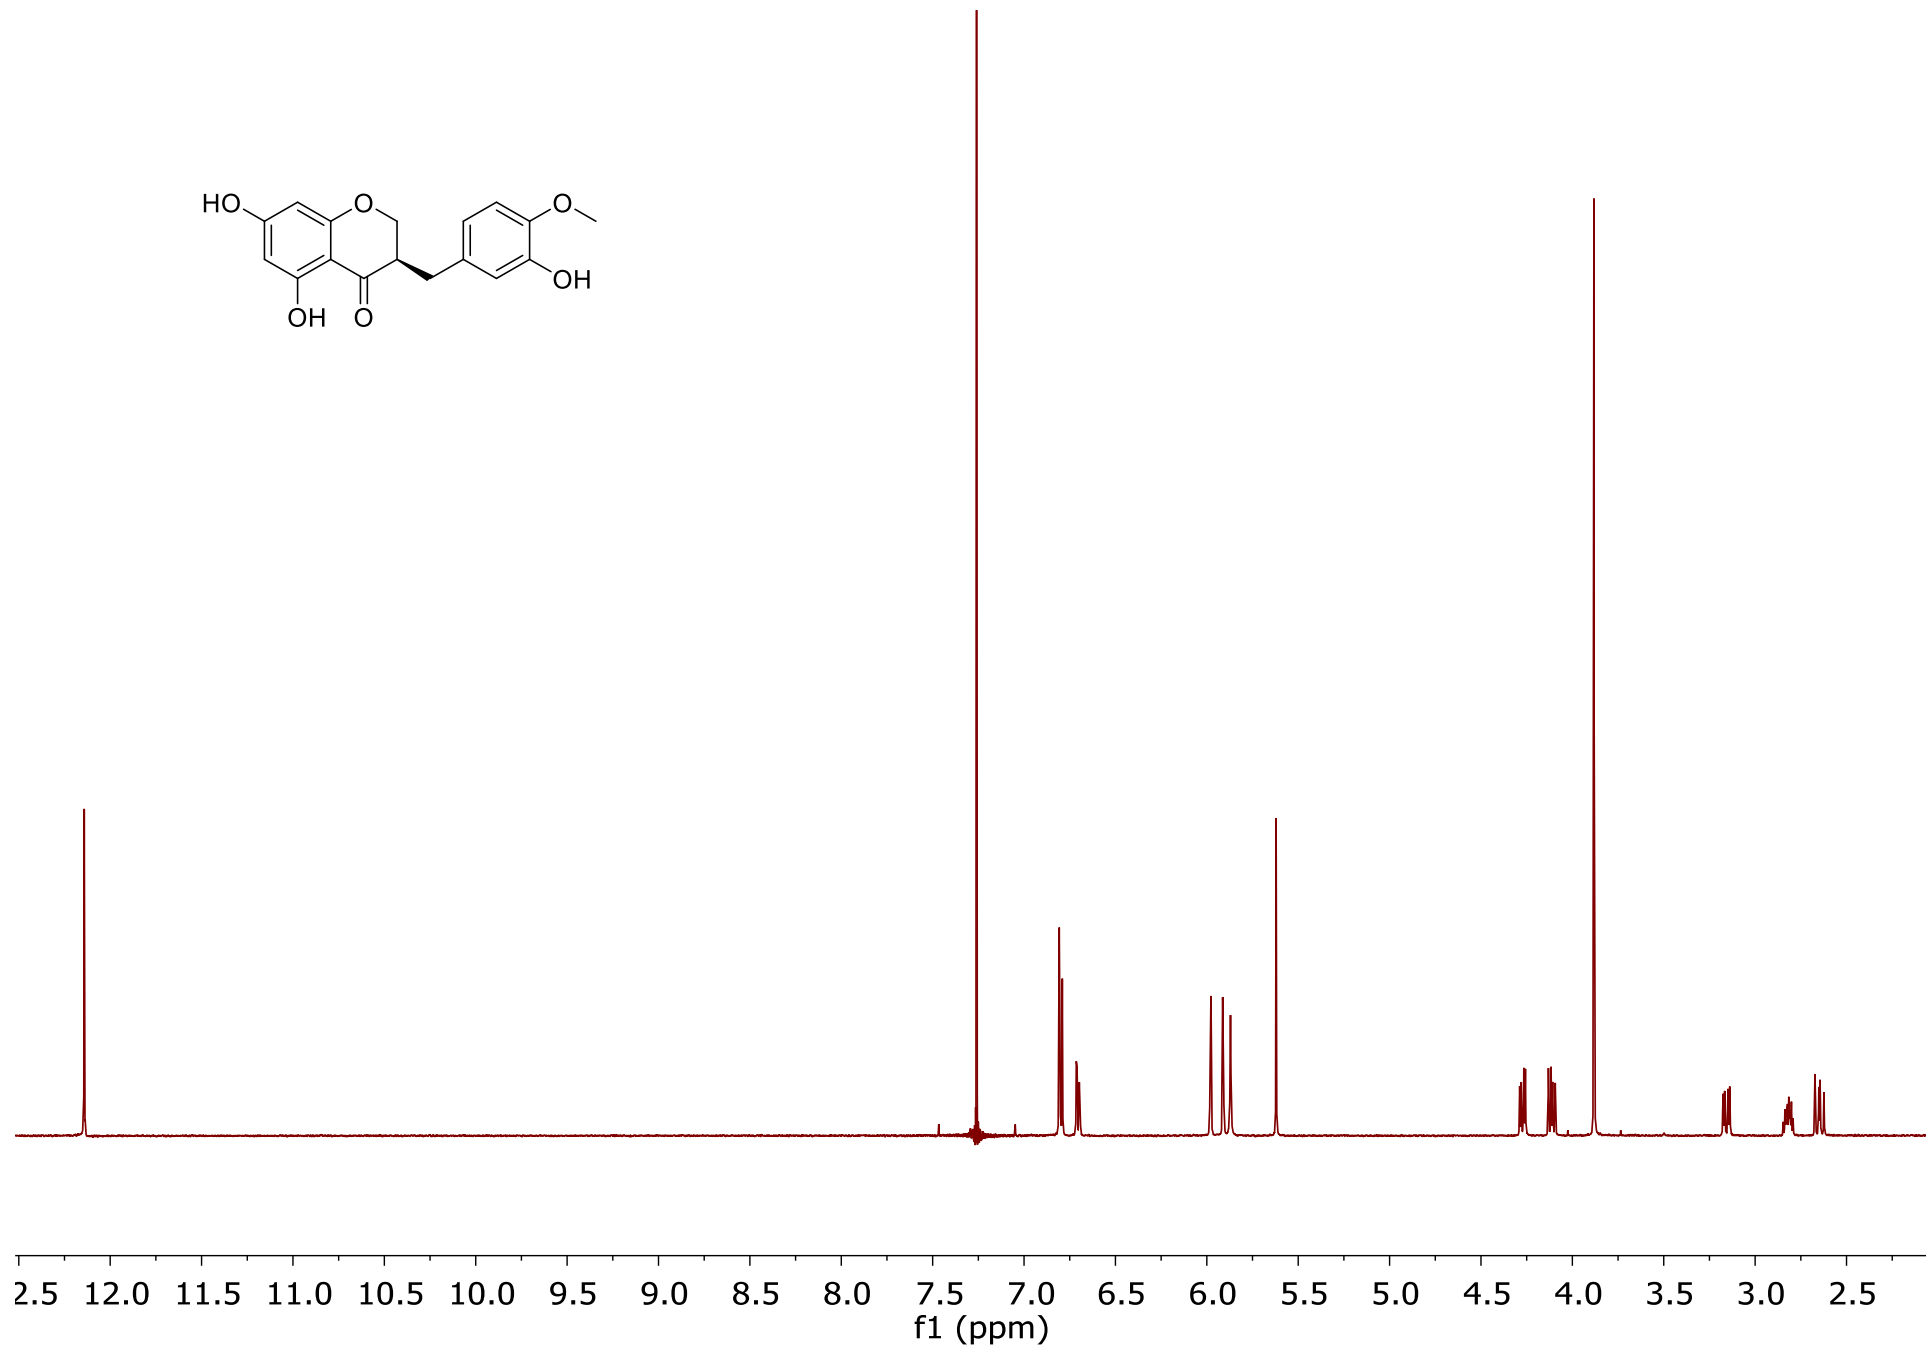

**Figure S2.** <sup>1</sup>H NMR spectrum of compound 2 [500 MHz, CDCl<sub>3</sub>].

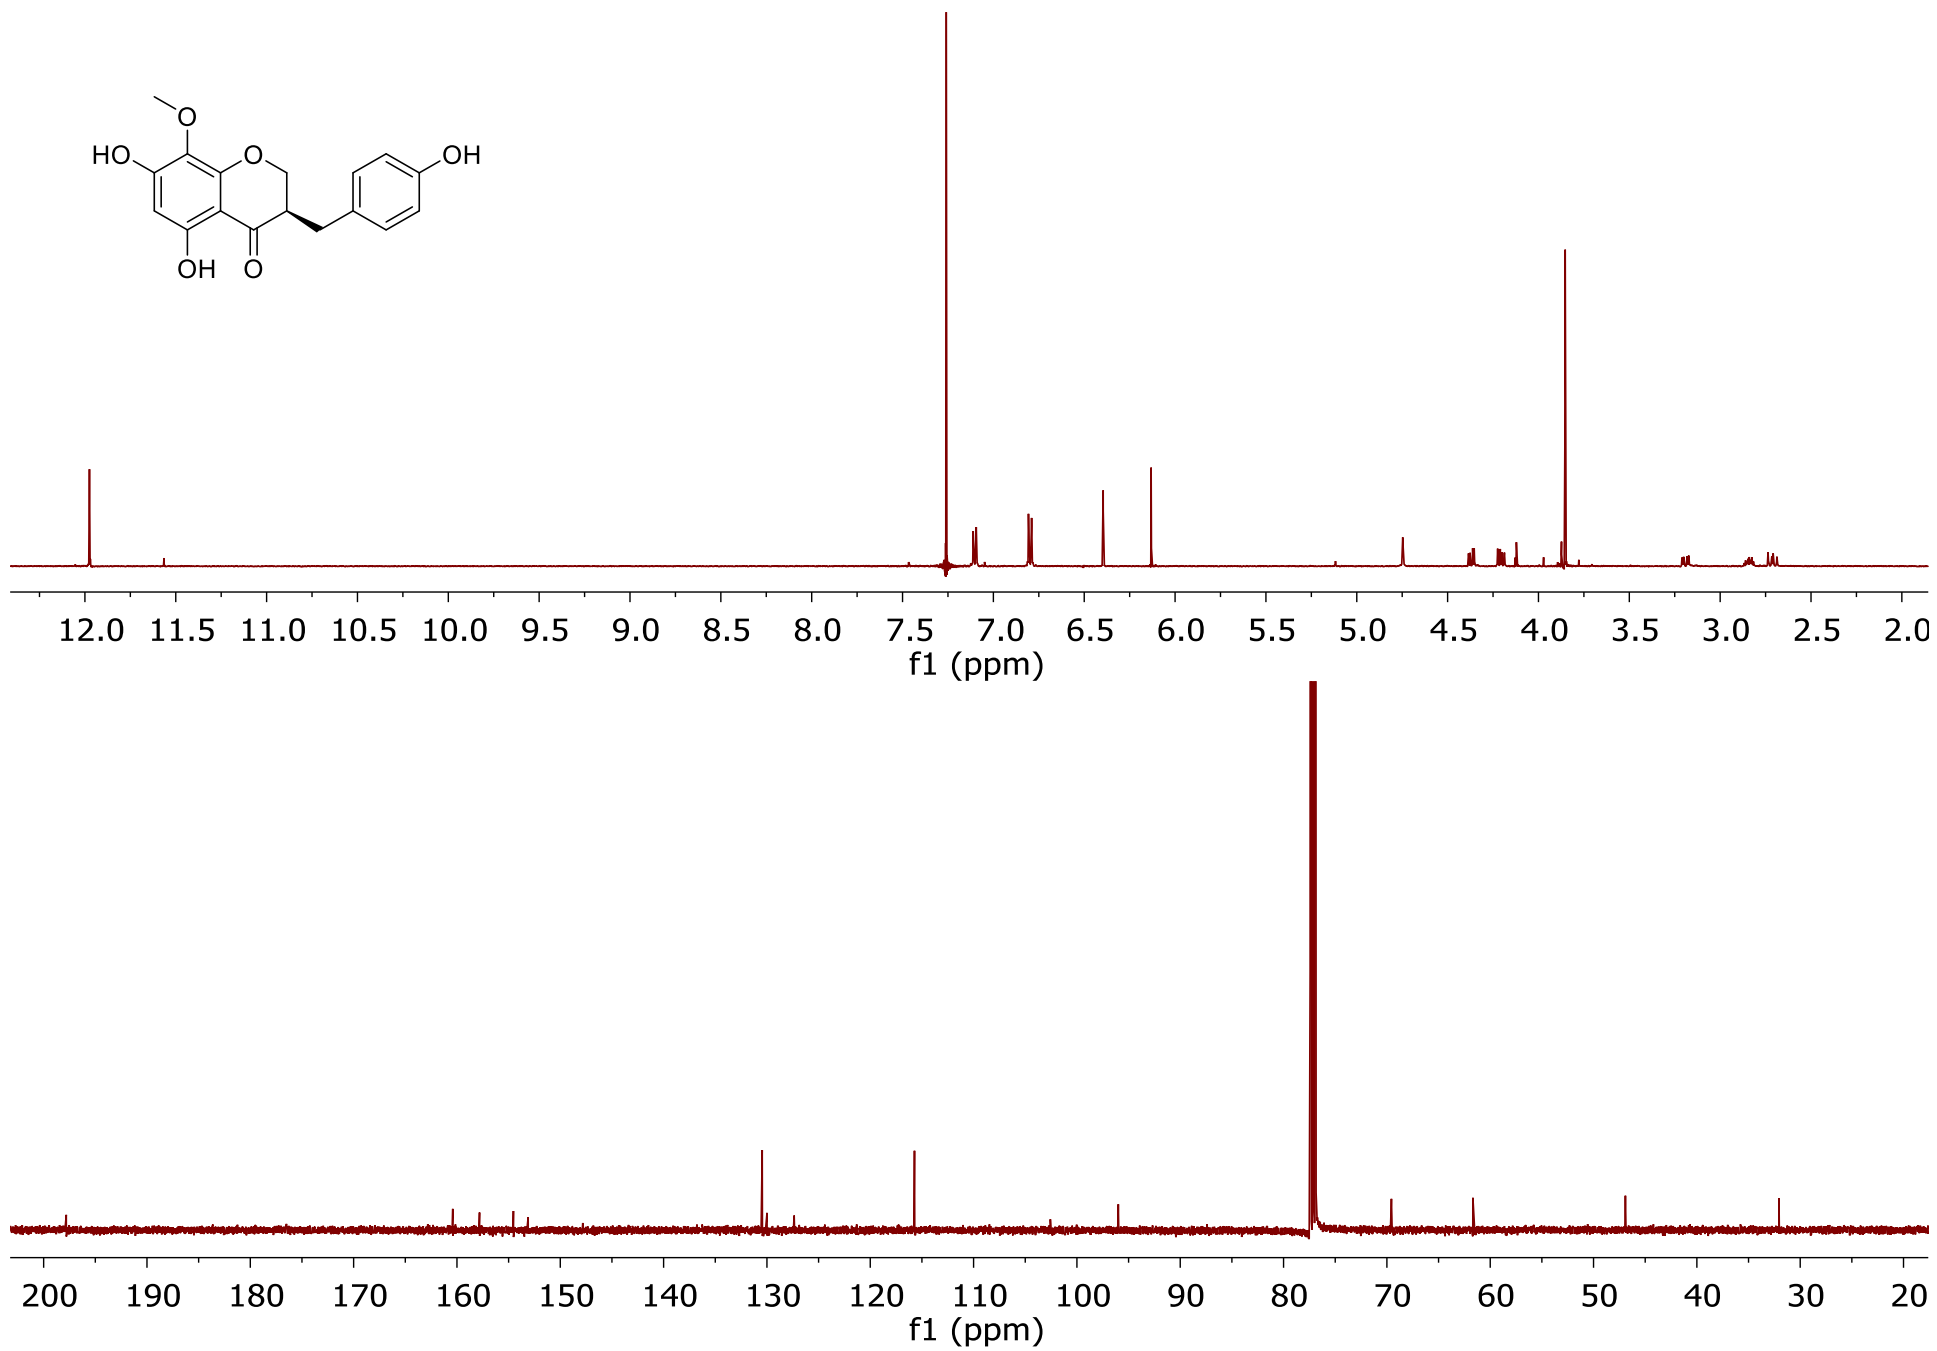

**Figure S3.**  $^1\text{H}$  and  $^{13}\text{C}$  NMR spectra of compound **3** [500 MHz for  $^1\text{H}$  and 125 MHz for  $^{13}\text{C}$ ,  $\text{CDCl}_3$ ].

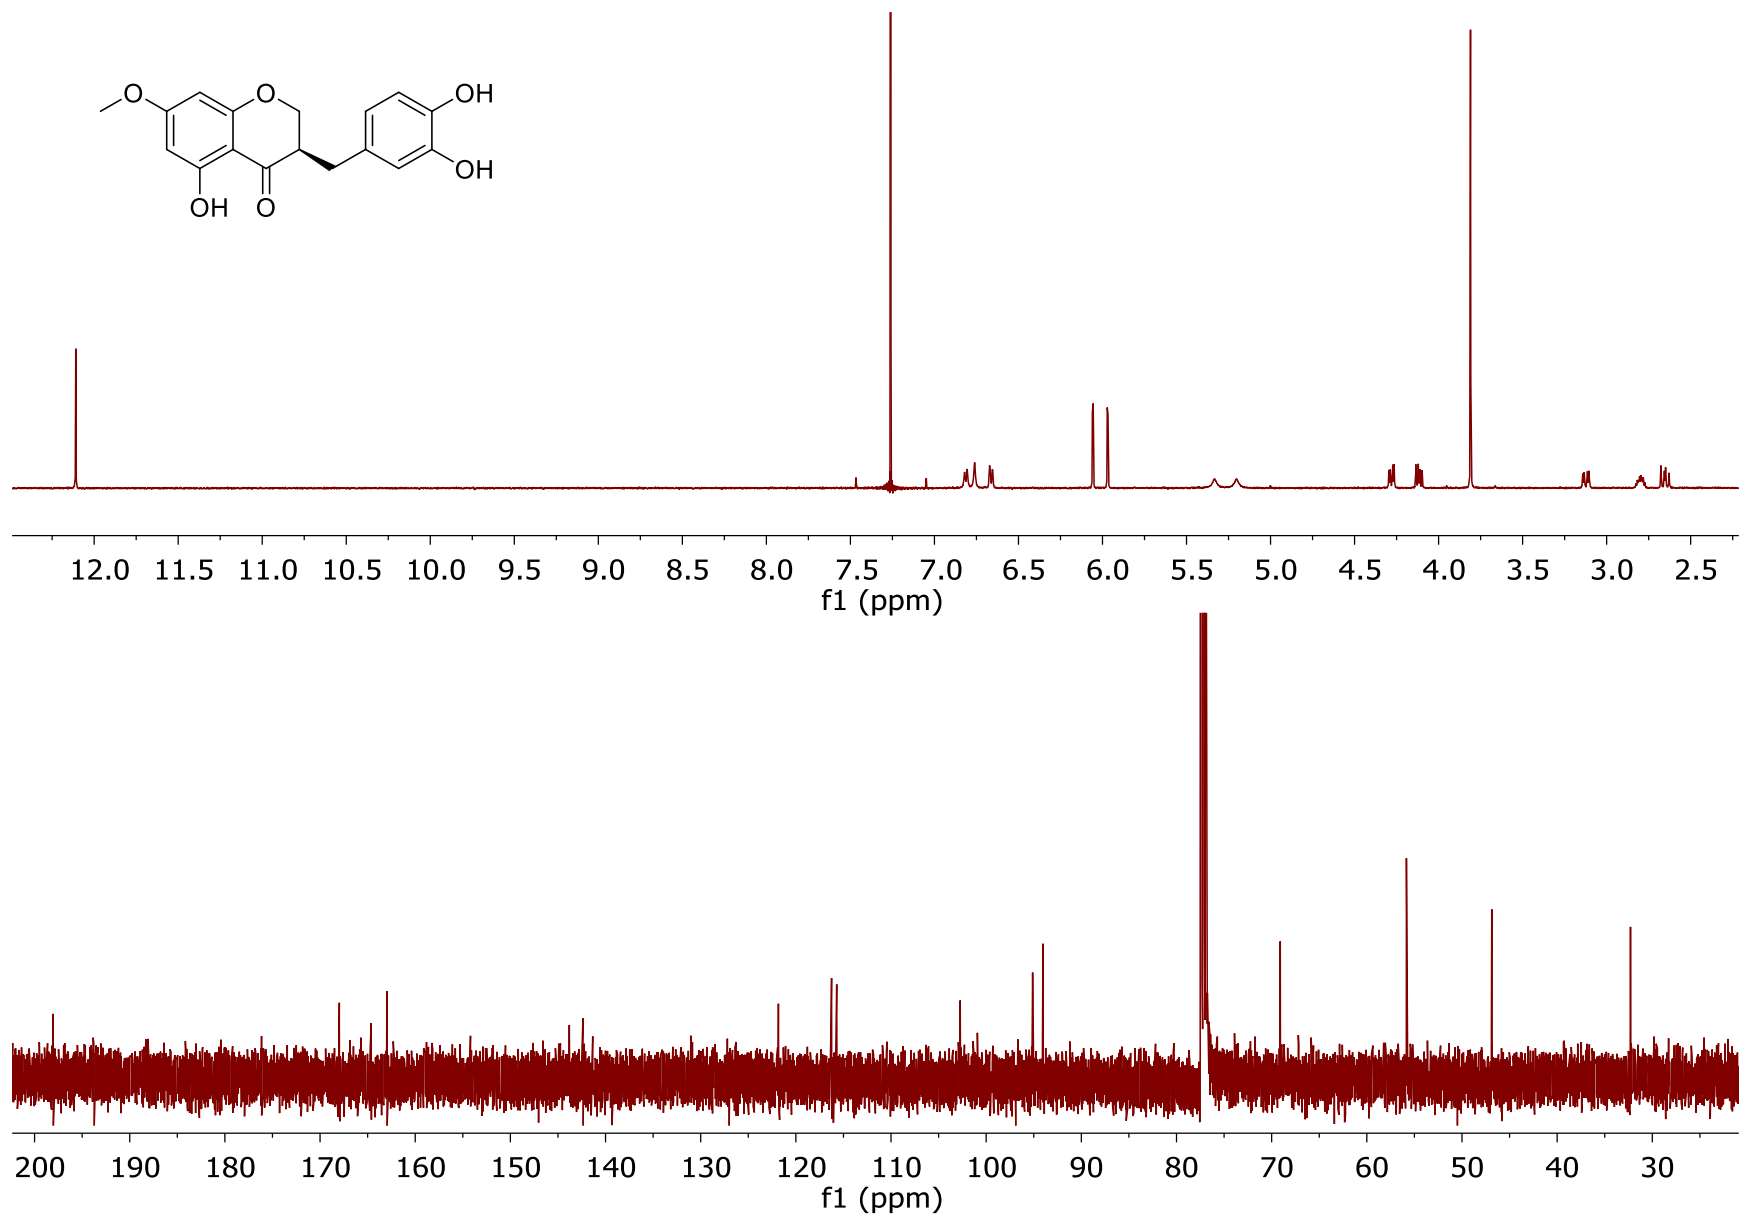

**Figure S4.**  $^1\text{H}$  and  $^{13}\text{C}$  NMR spectra of compound 4 [500 MHz for  $^1\text{H}$  and 125 MHz for  $^{13}\text{C}$ ,  $\text{CDCl}_3$ ].

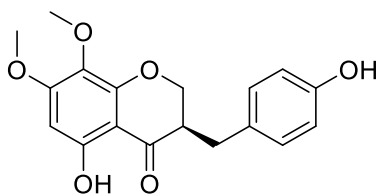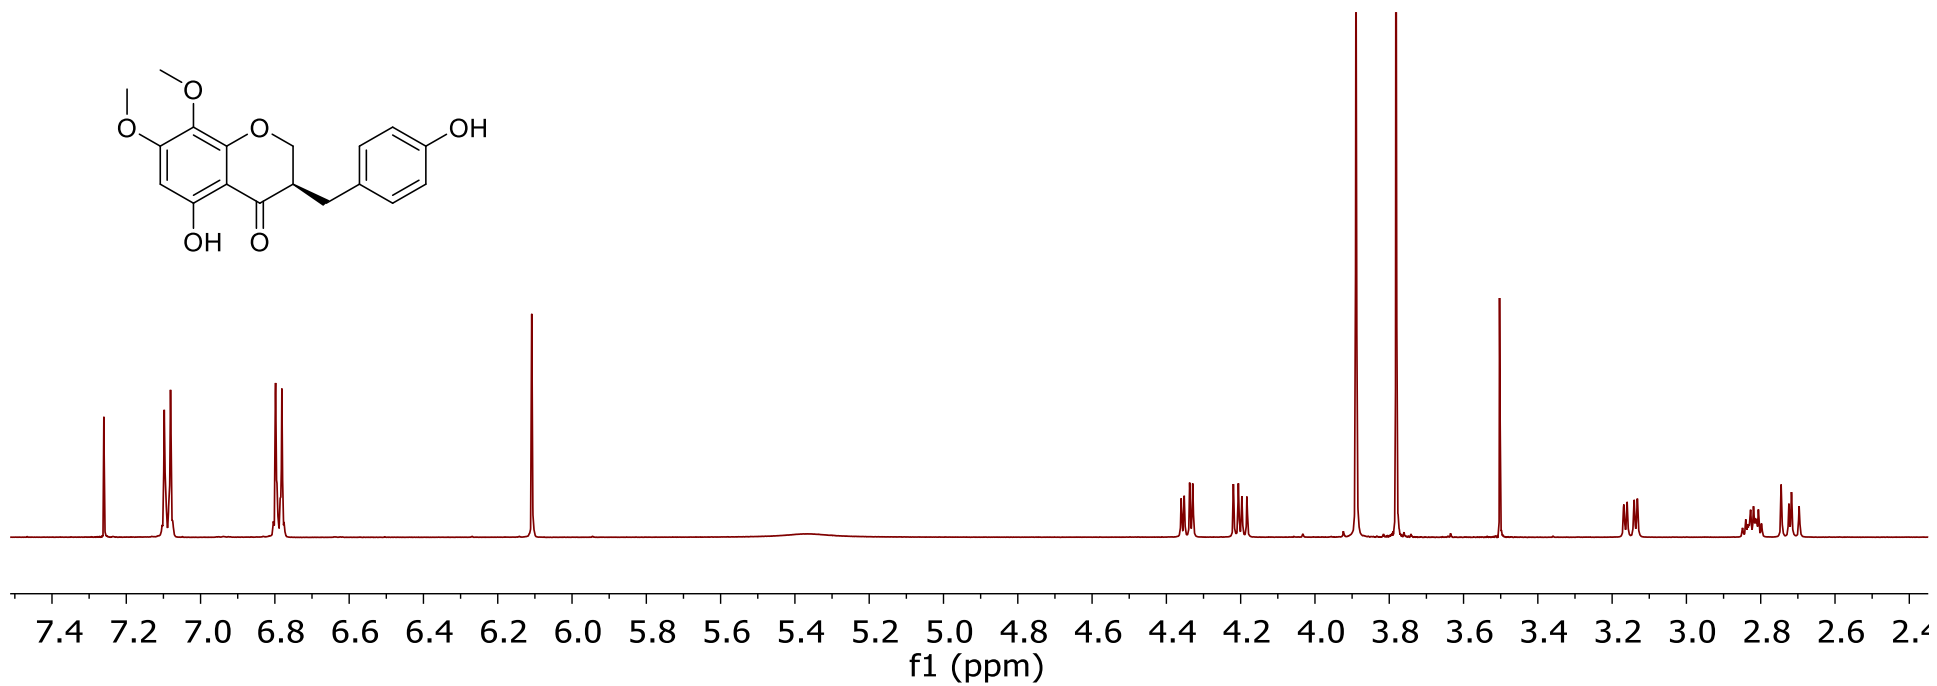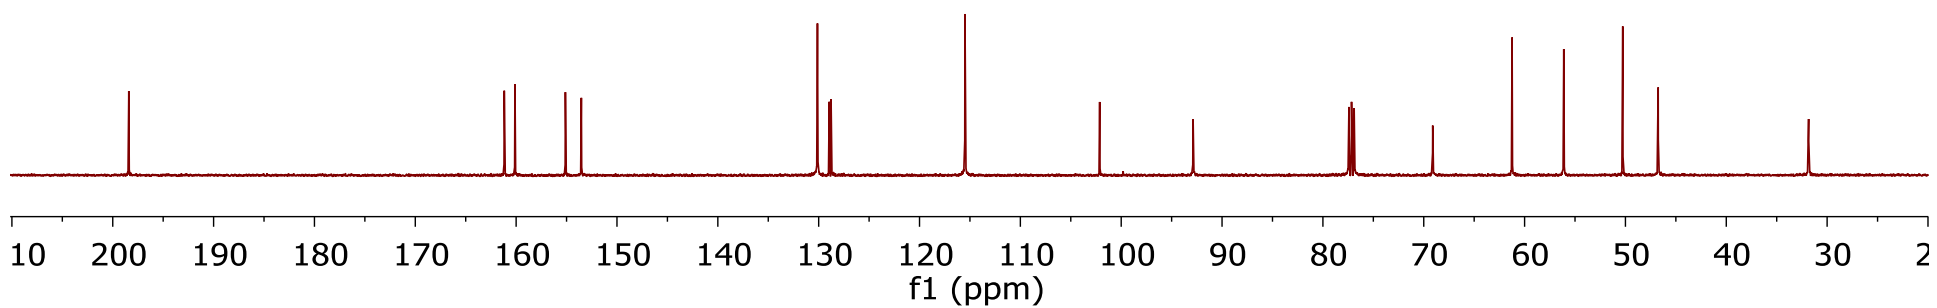

**Figure S5.**  $^1\text{H}$  and  $^{13}\text{C}$  NMR spectra of compound 5 [500 MHz for  $^1\text{H}$  and 125 MHz for  $^{13}\text{C}$ ,  $\text{CDCl}_3$ ].

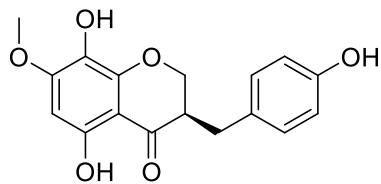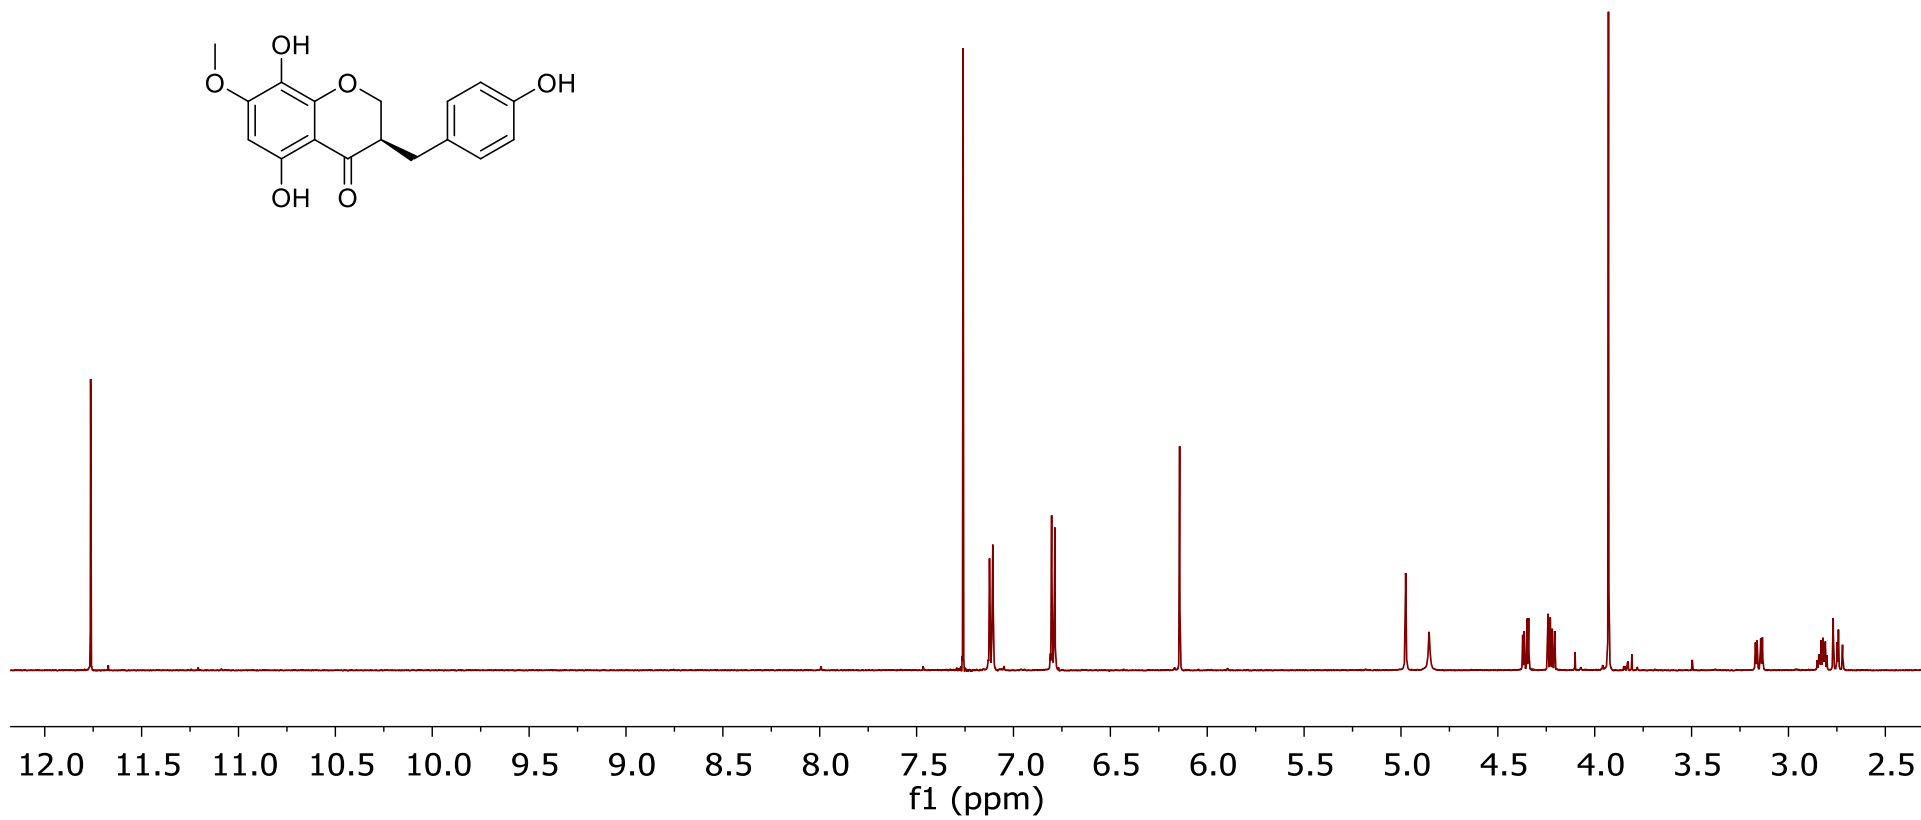

**Figure S6.** <sup>1</sup>H NMR spectrum of compound 6 [500 MHz, CDCl<sub>3</sub>].

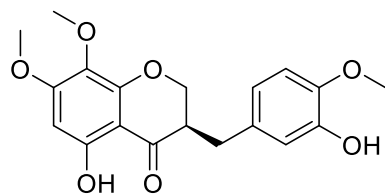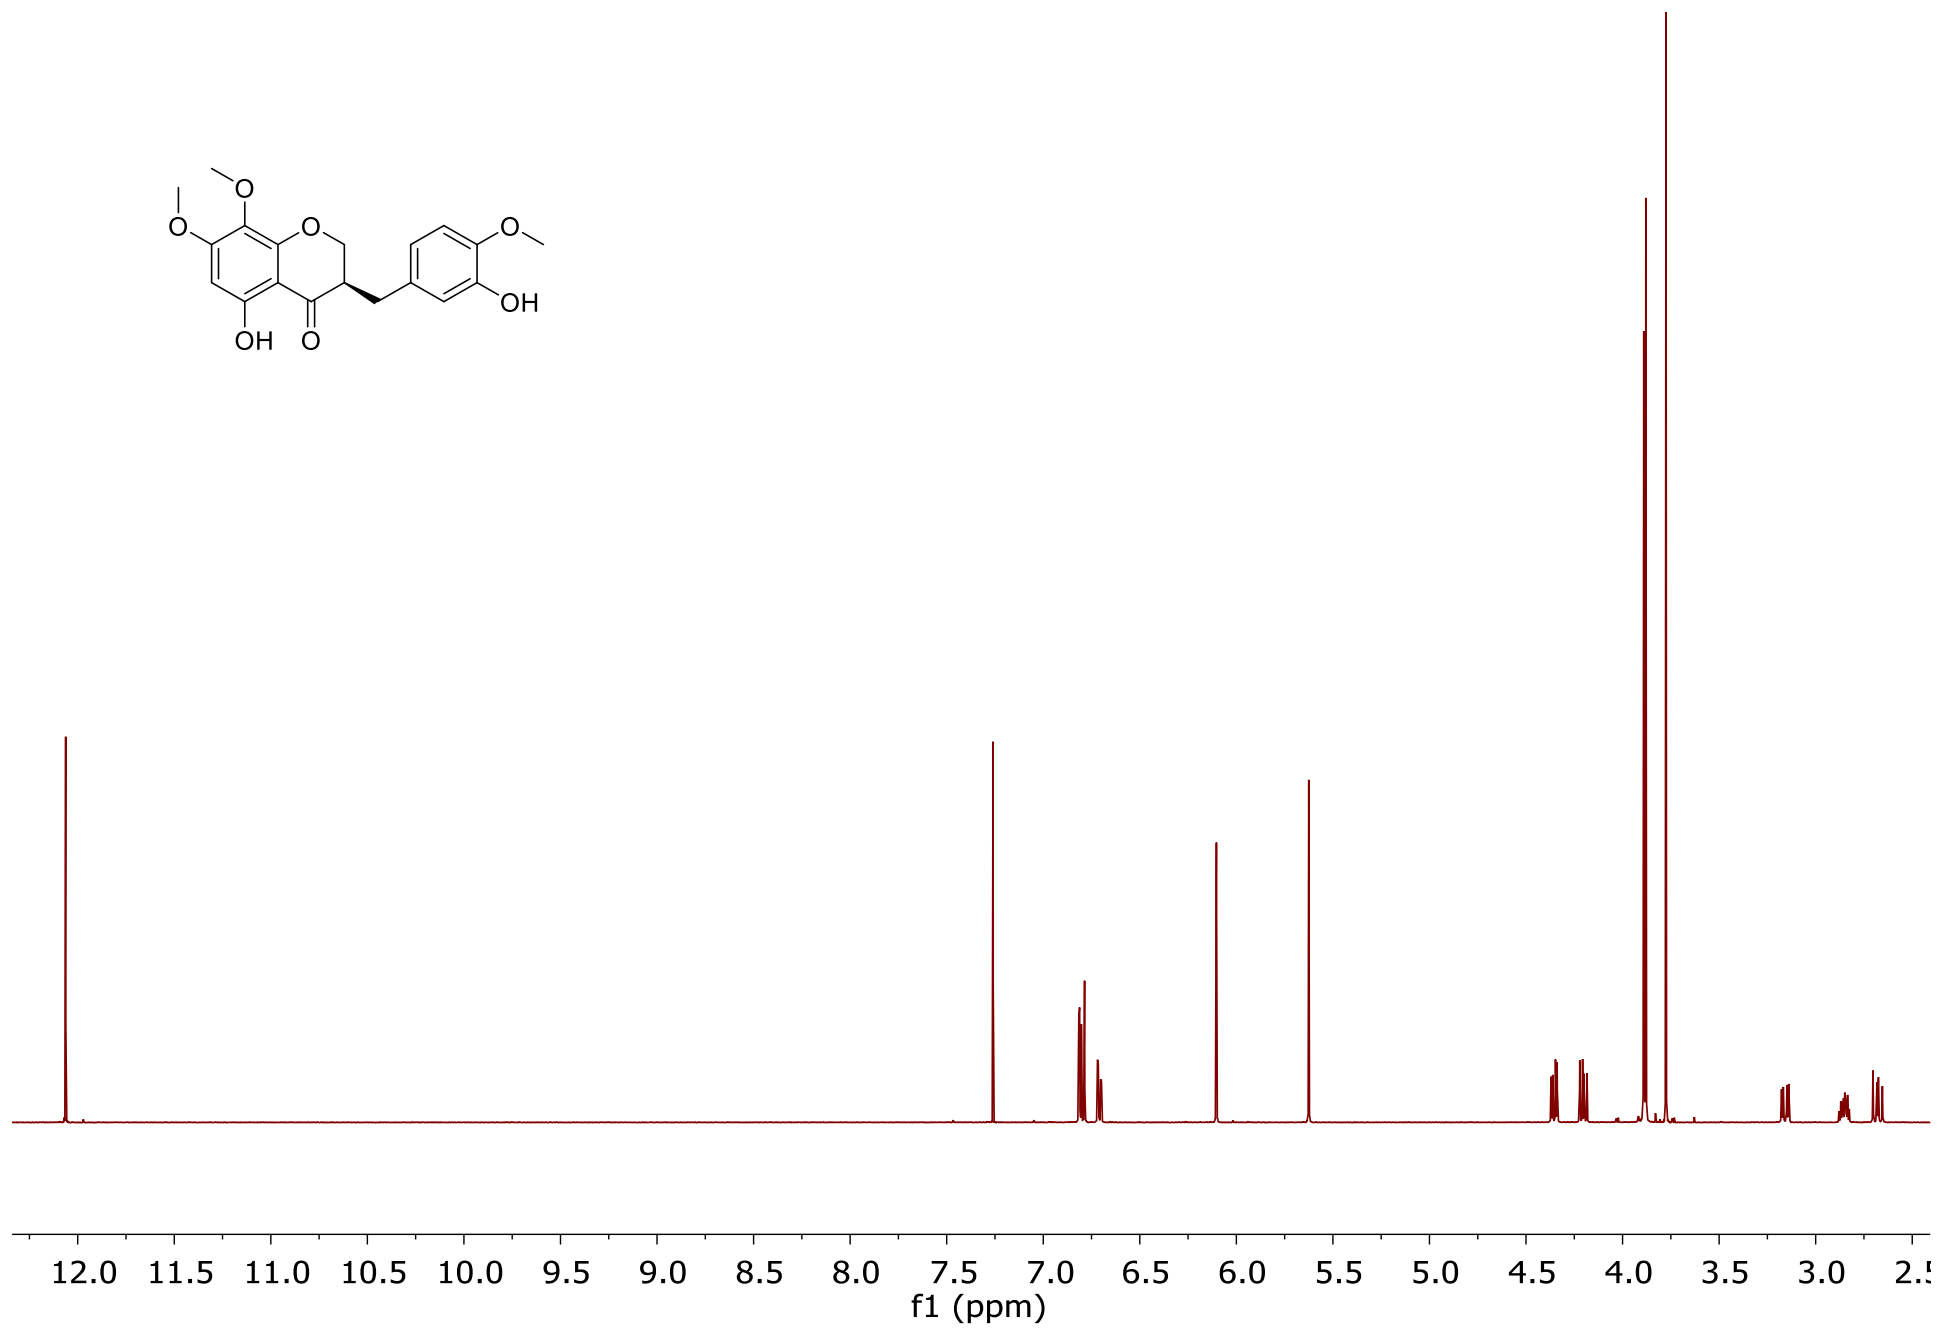

**Figure S7.** <sup>1</sup>H NMR spectrum of compound 7 [500 MHz, CDCl<sub>3</sub>].



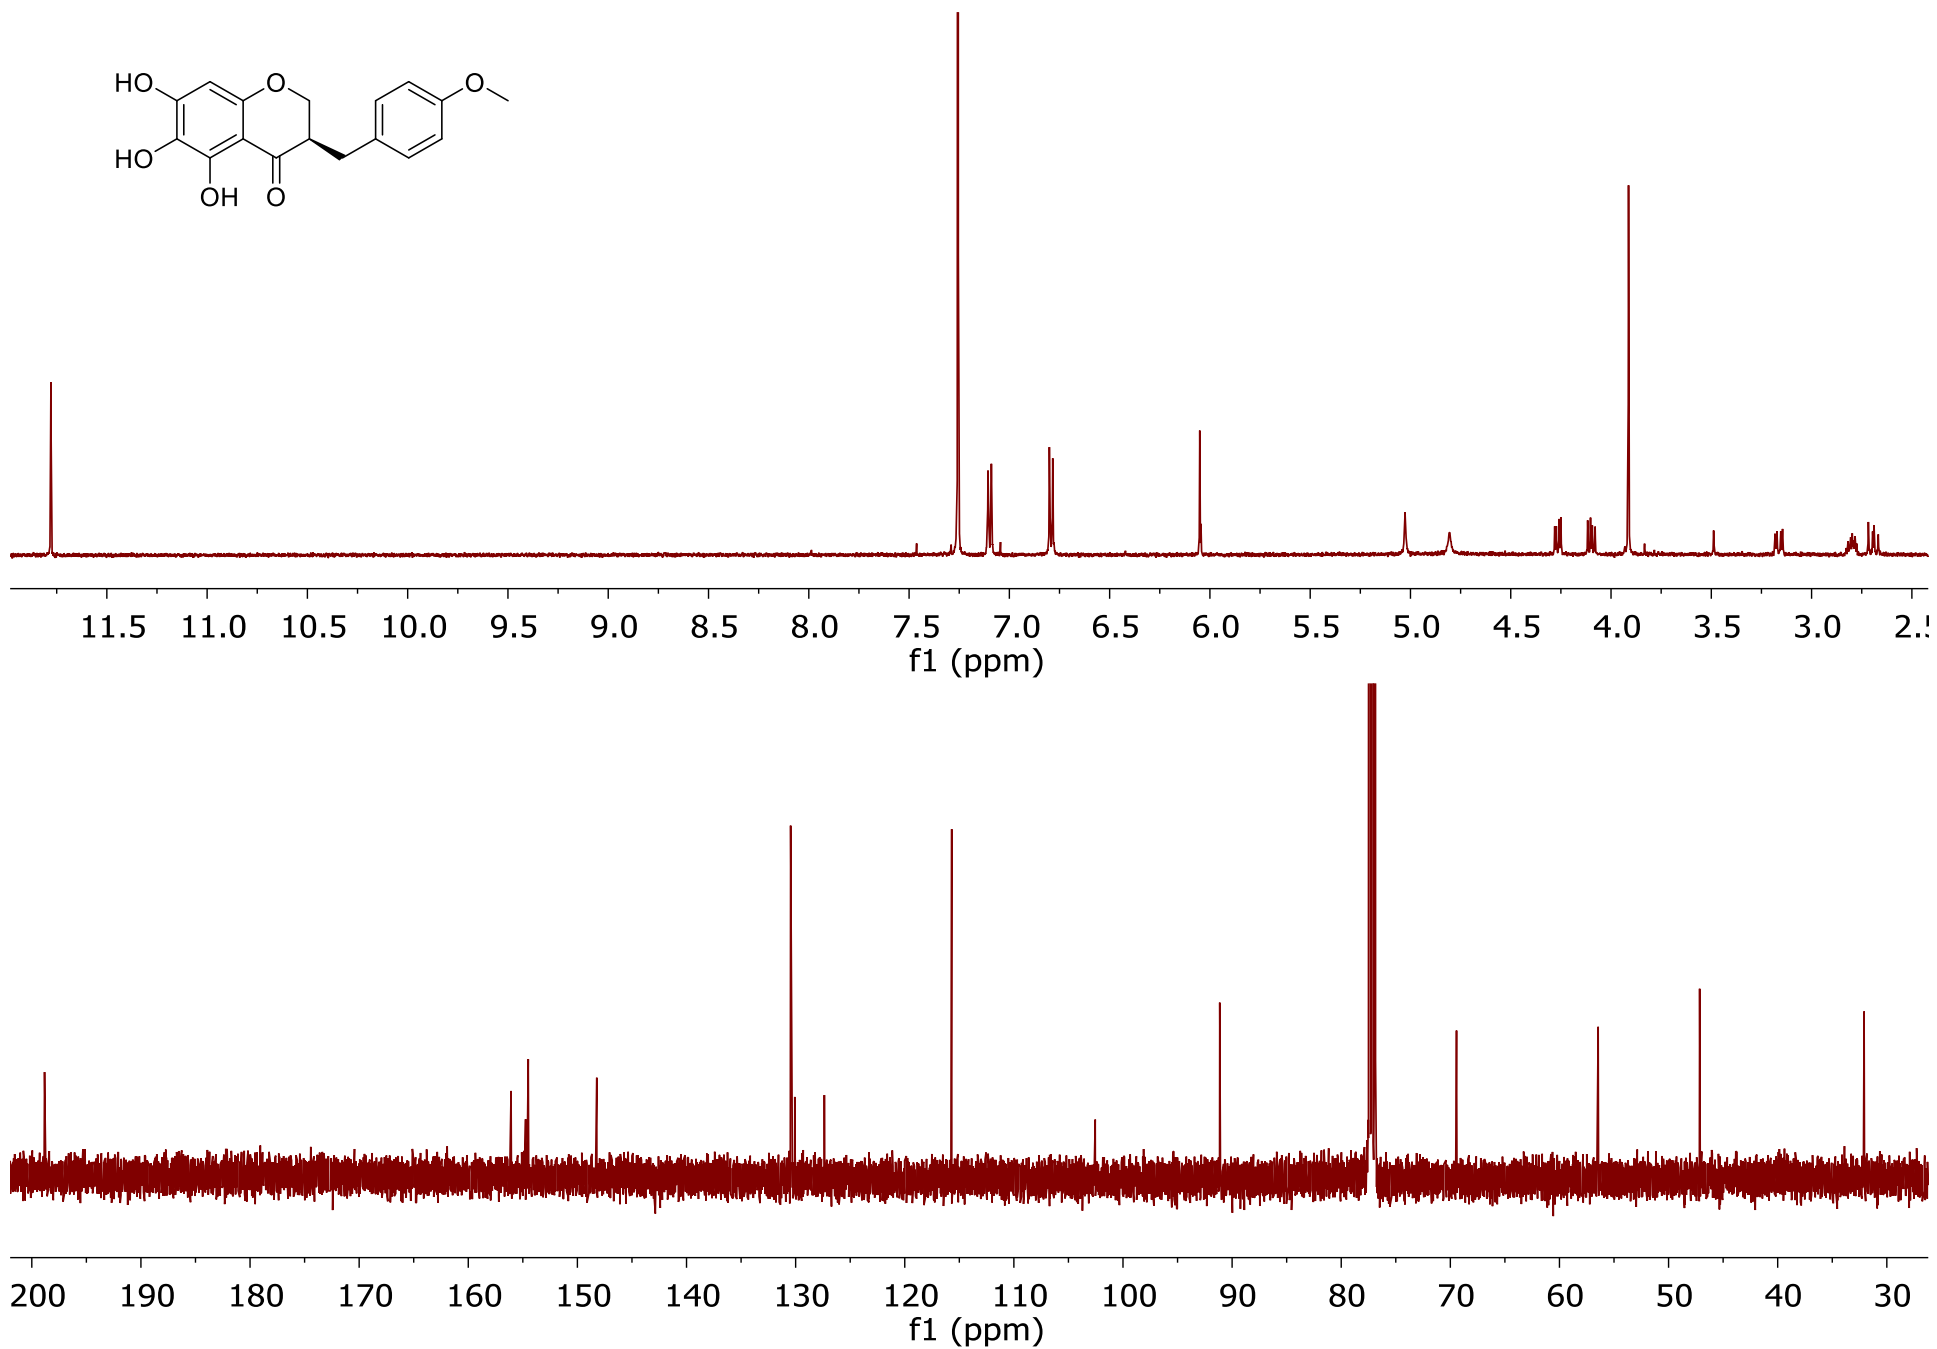

**Figure S8.**  $^1\text{H}$  and  $^{13}\text{C}$  NMR spectra of compound **8** [500 MHz for  $^1\text{H}$  and 125 MHz for  $^{13}\text{C}$ ,  $\text{CDCl}_3$ ].

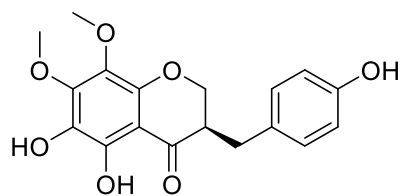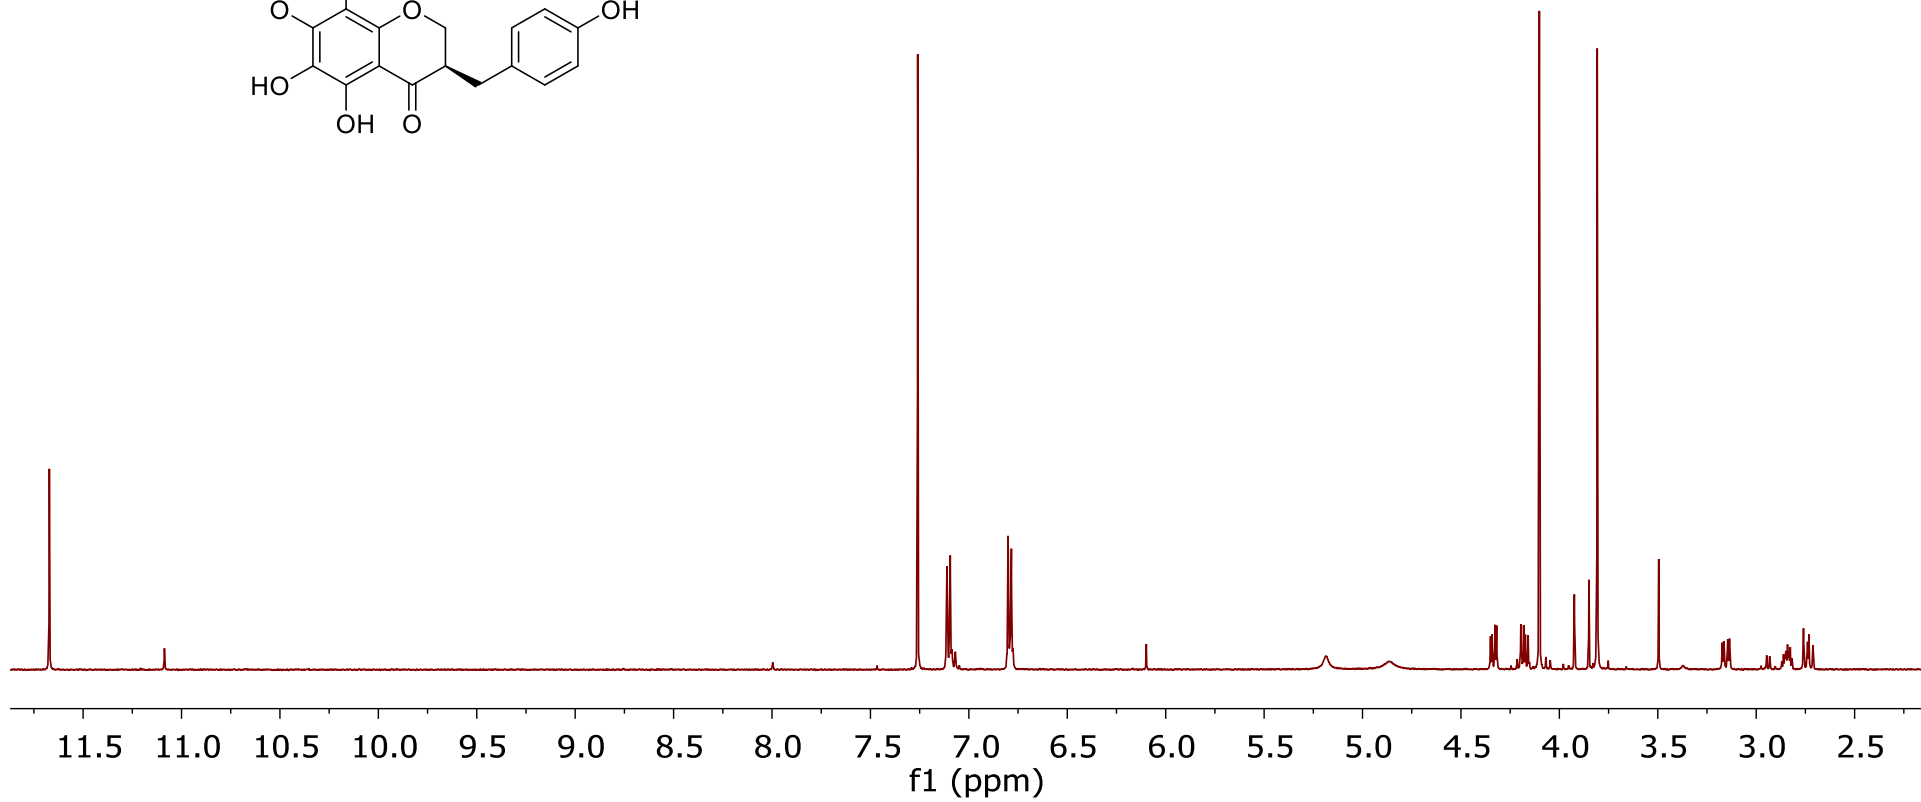

**Figure S9.** <sup>1</sup>H NMR spectrum of compound 9 [500 MHz, CDCl<sub>3</sub>].

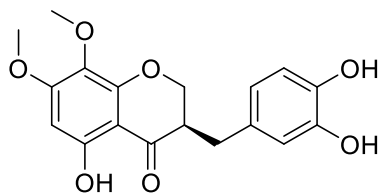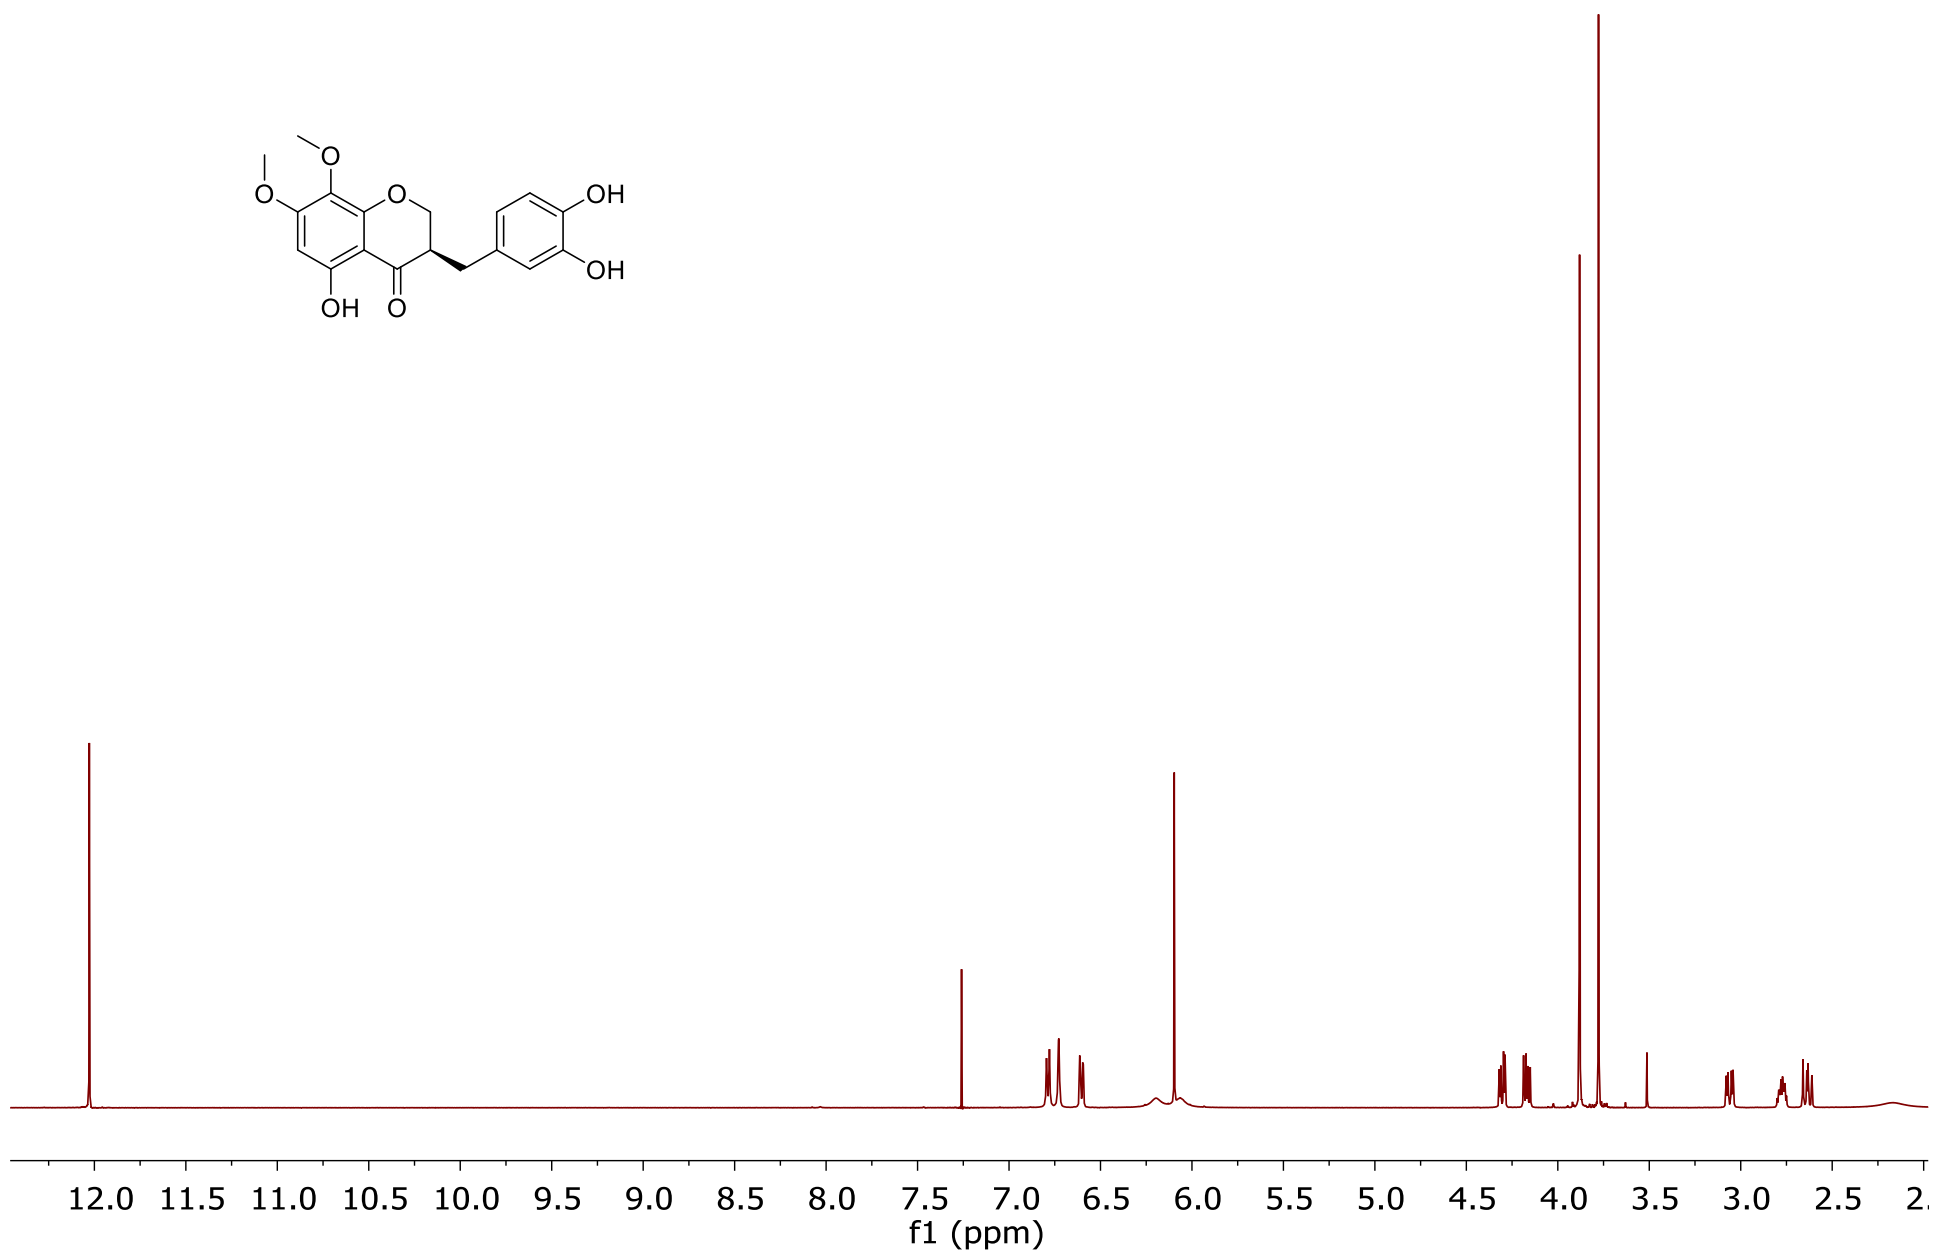

**Figure S10.** <sup>1</sup>H NMR spectrum of compound **10** [500 MHz, CDCl<sub>3</sub>].

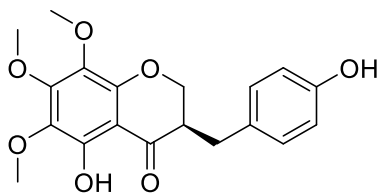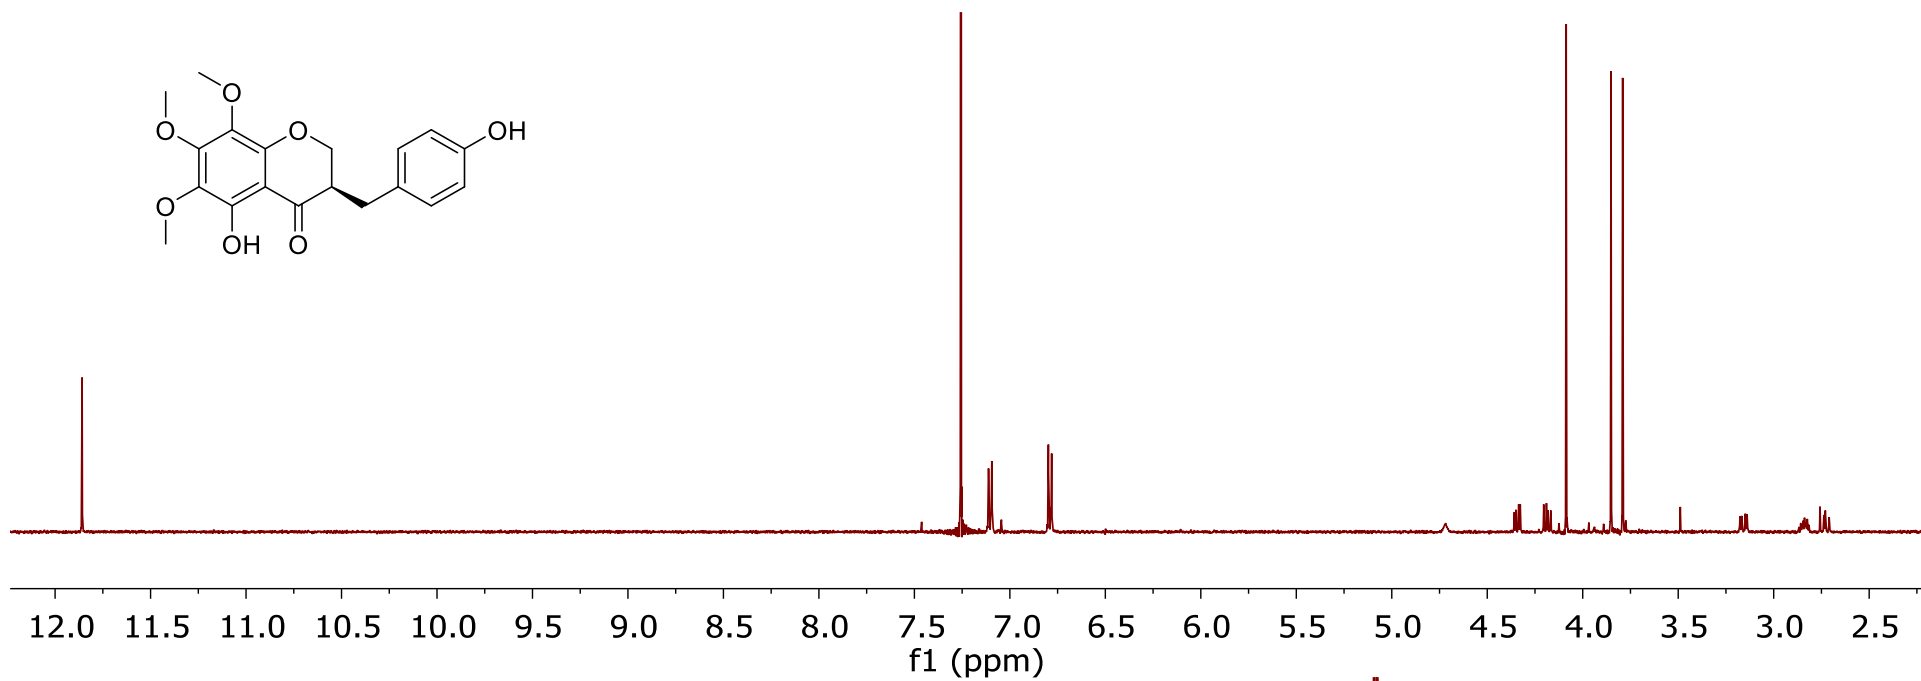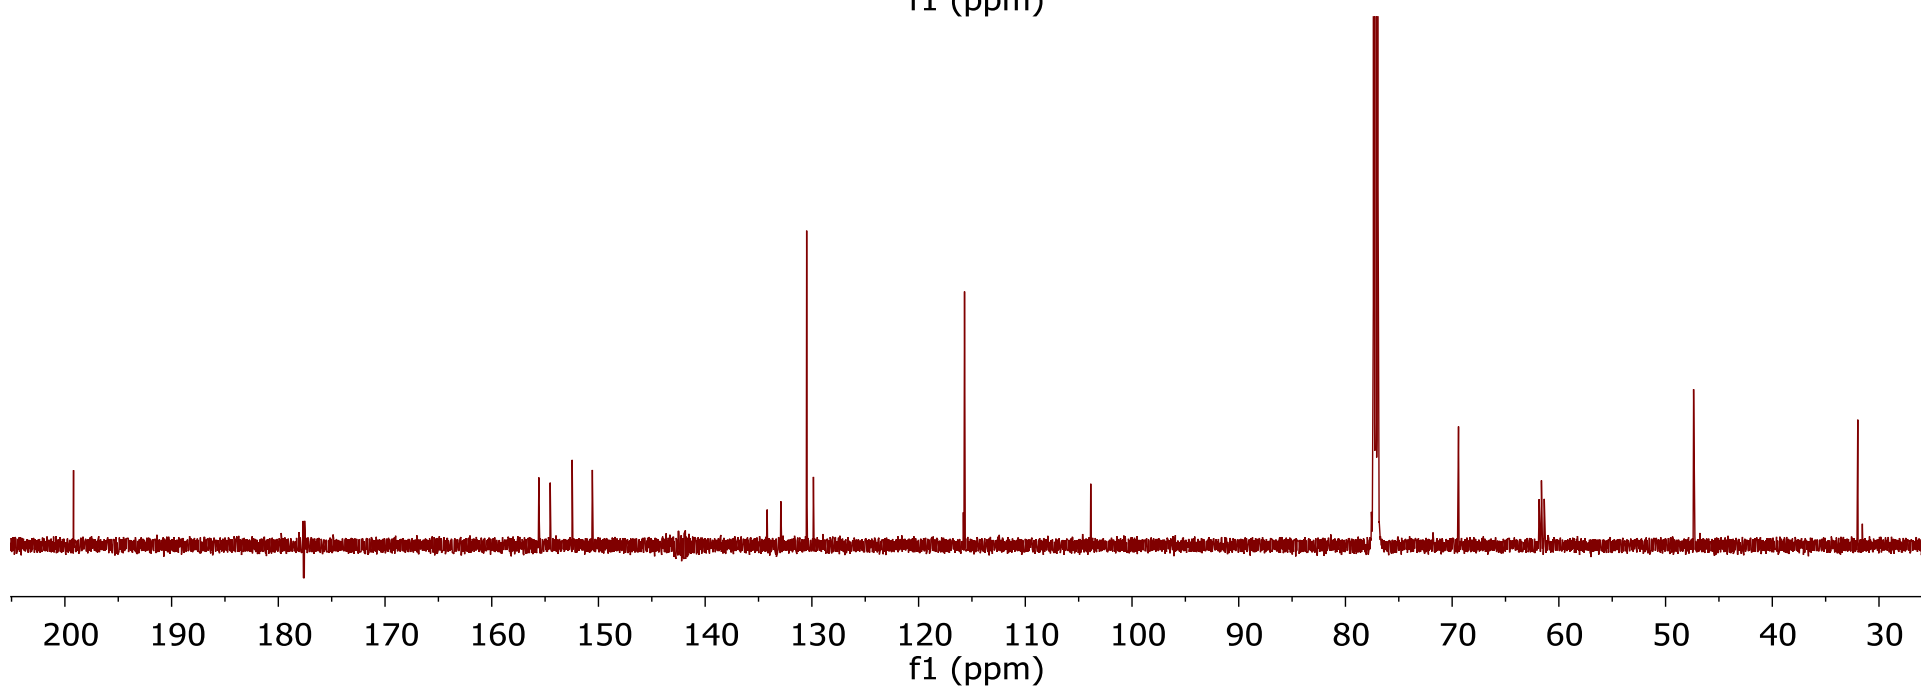

**Figure S11.**  $^1\text{H}$  and  $^{13}\text{C}$  NMR spectra of compound 11 [500 MHz for  $^1\text{H}$  and 175 MHz for  $^{13}\text{C}$ ,  $\text{CDCl}_3$ ].

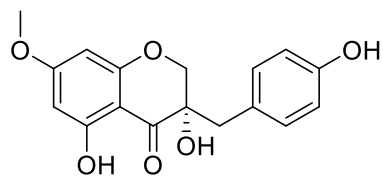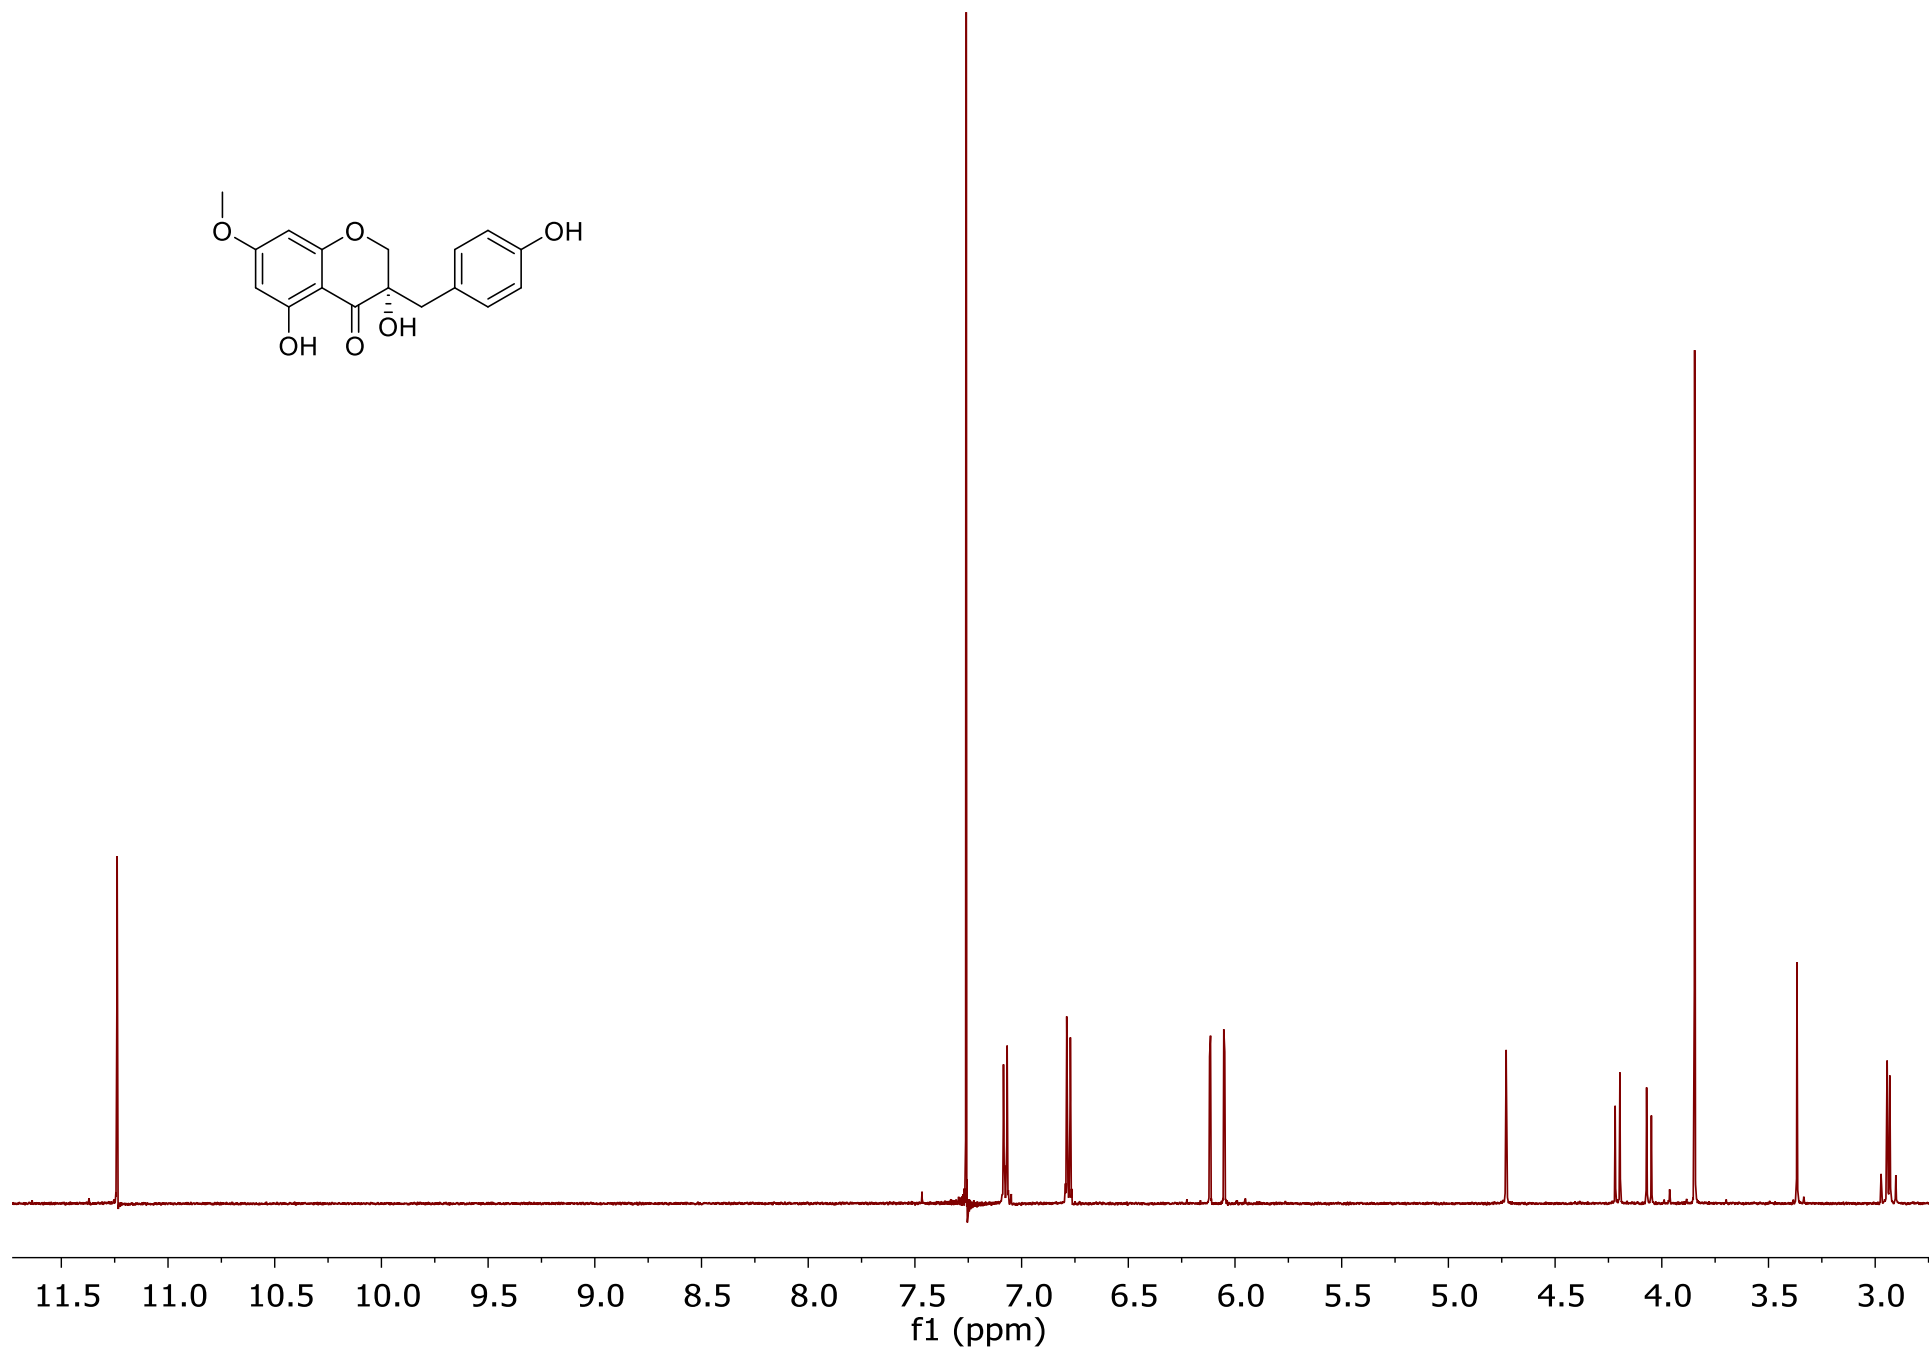

**Figure S12.** <sup>1</sup>H NMR spectrum of compound **12** [500 MHz, CDCl<sub>3</sub>].

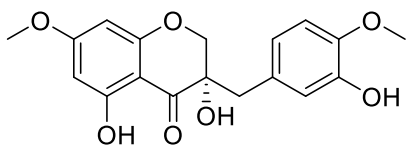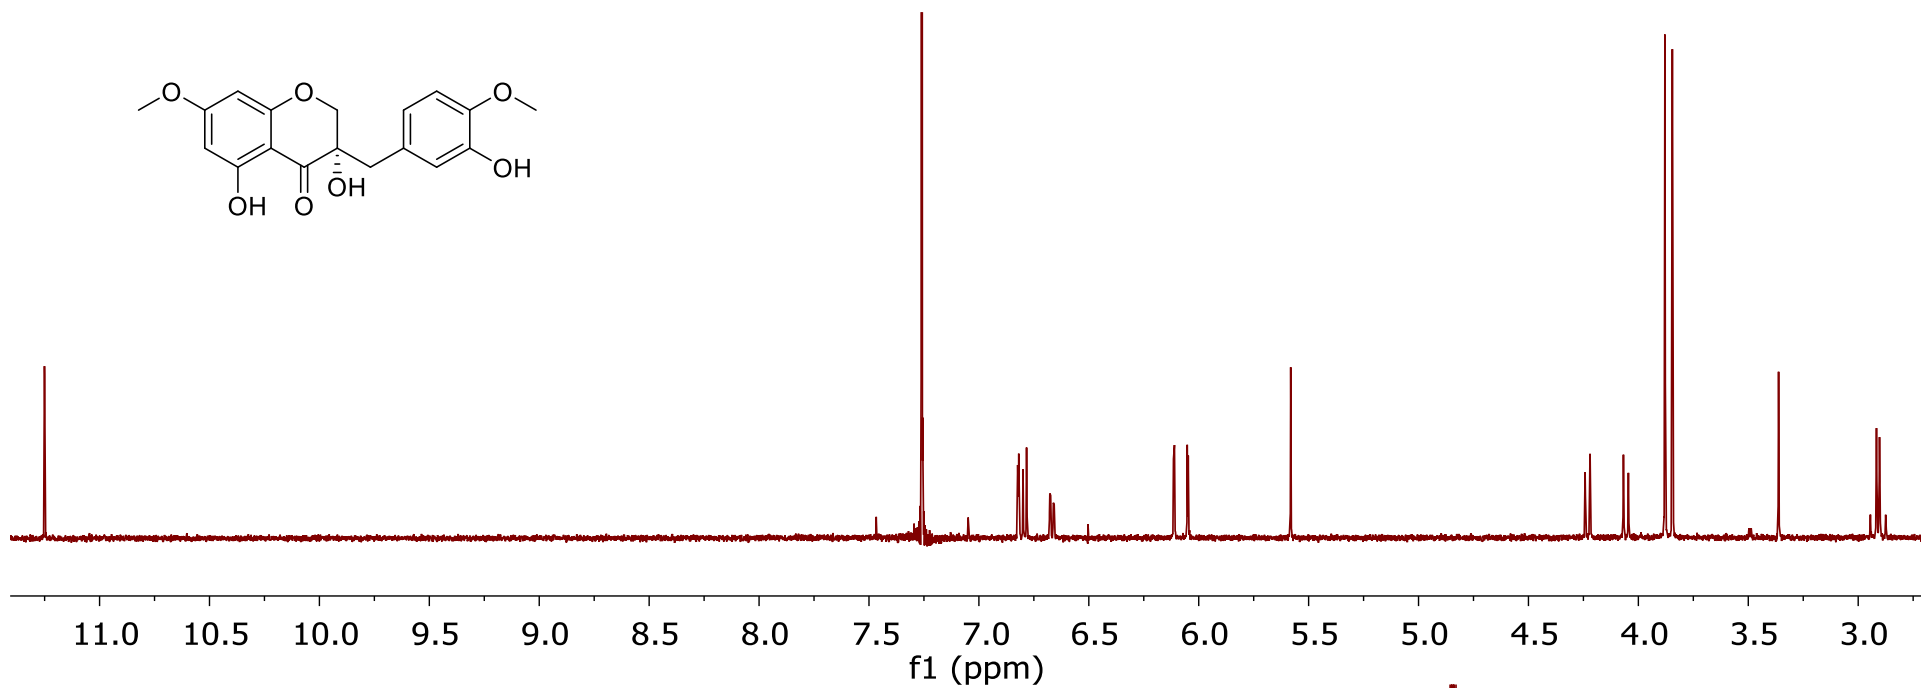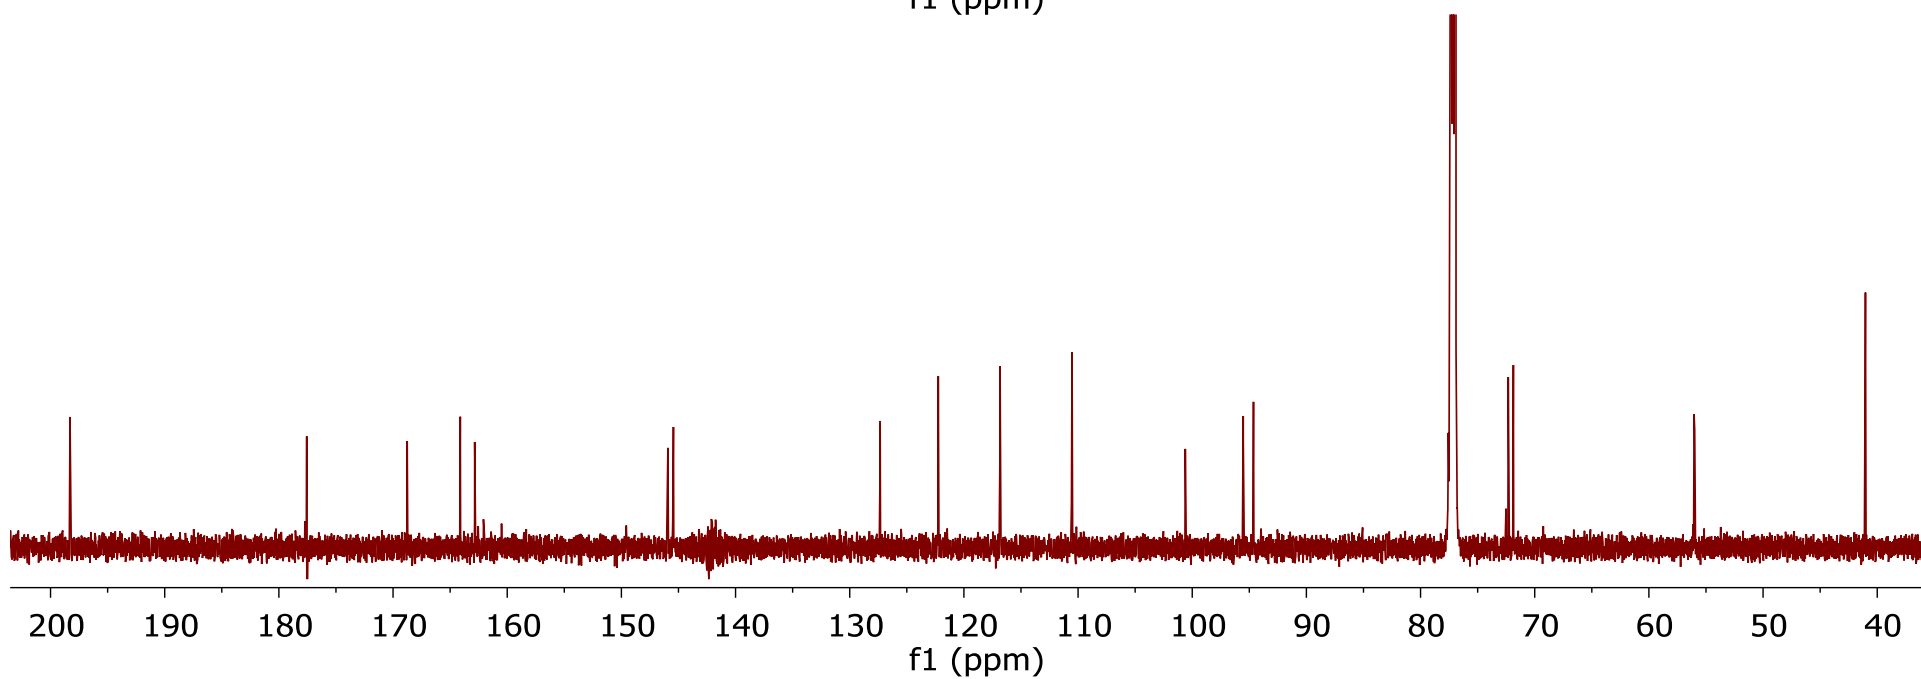

**Figure S13.** <sup>1</sup>H and <sup>13</sup>C NMR spectra of compound **13** [500 MHz for <sup>1</sup>H and 175 MHz for <sup>13</sup>C, CDCl<sub>3</sub>].

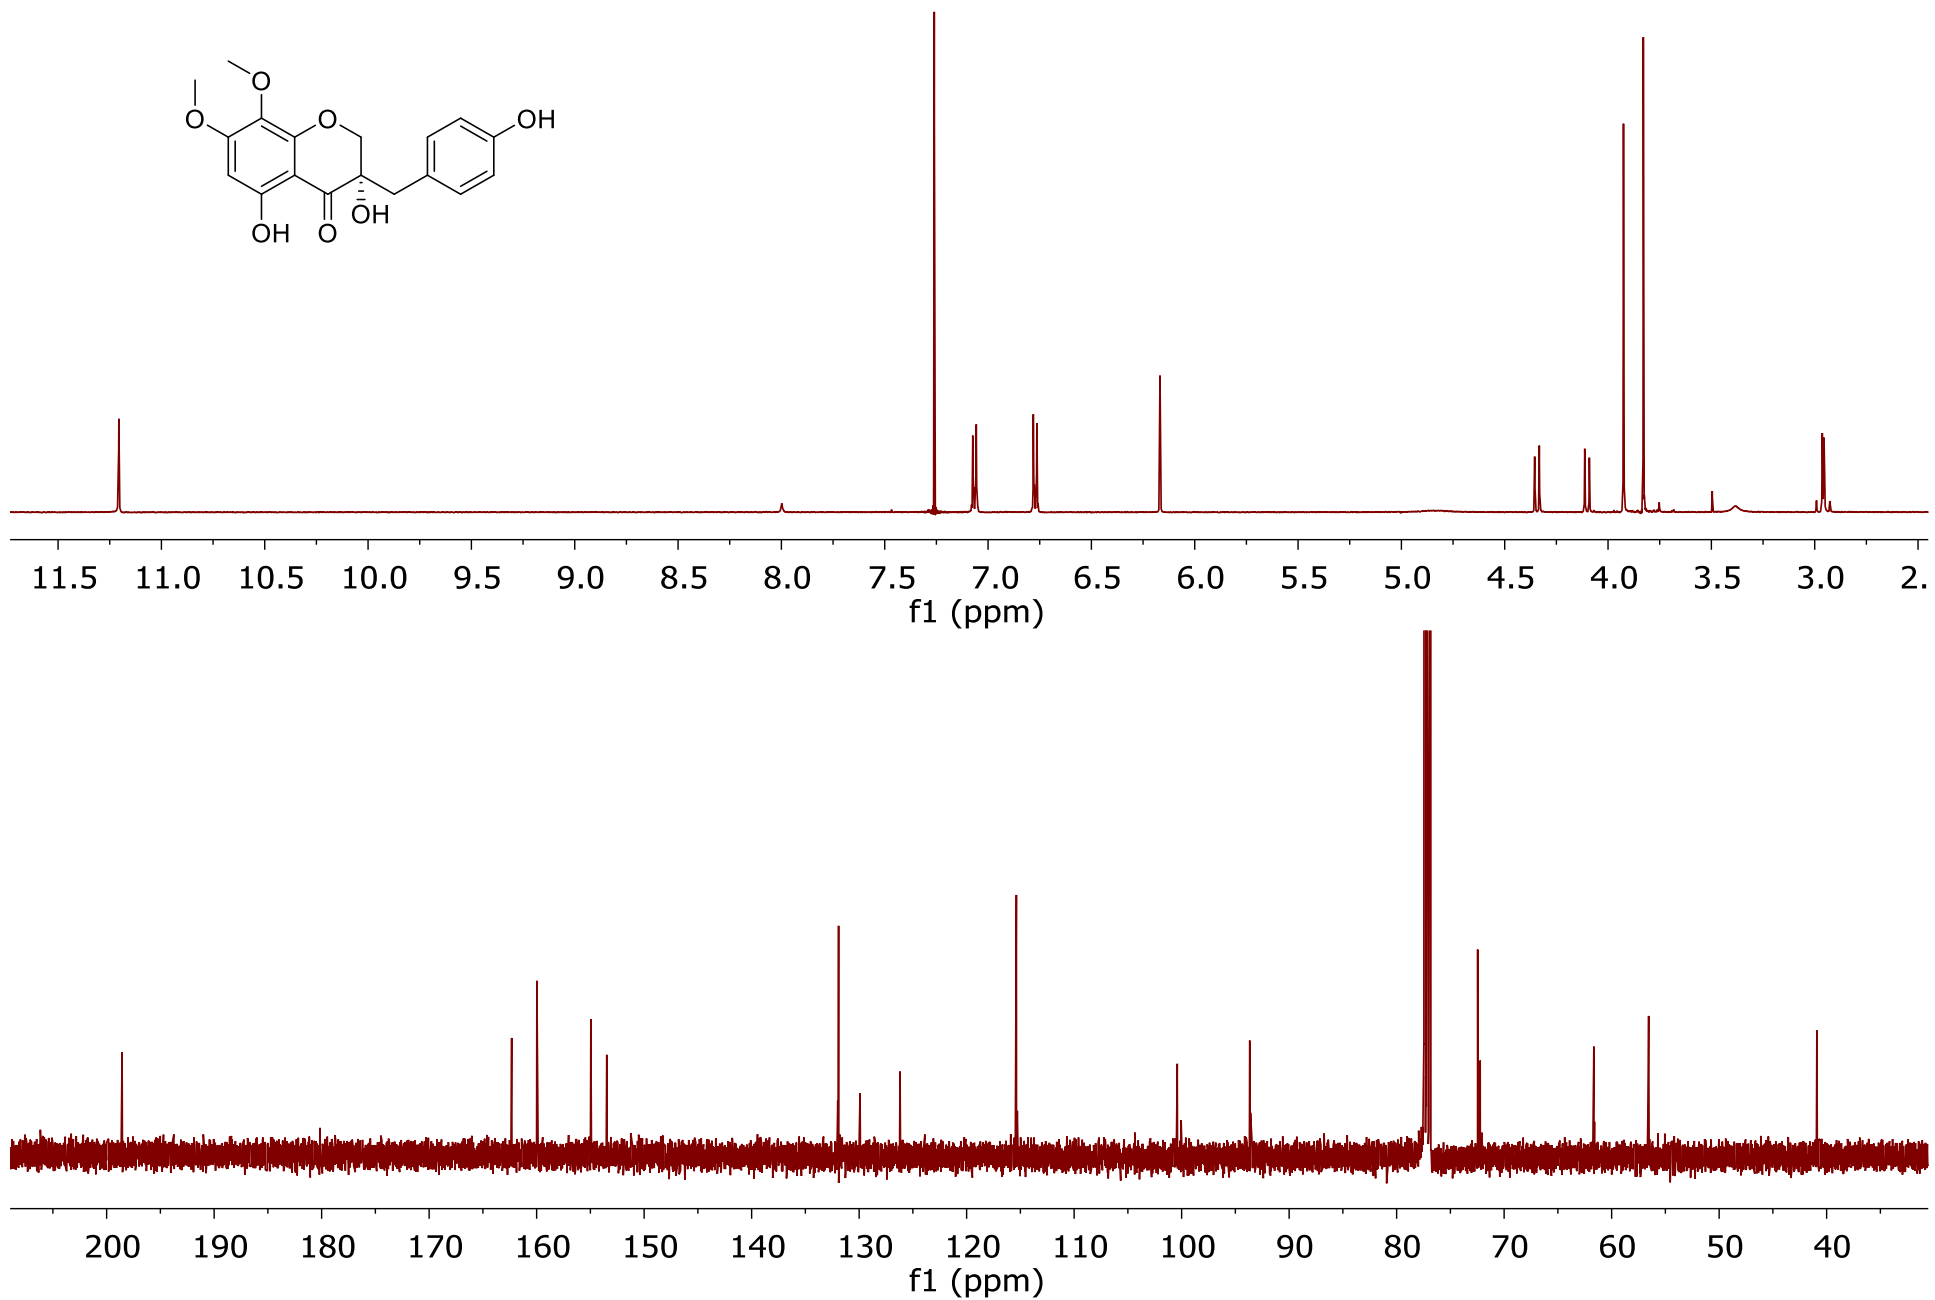

**Figure S14.**  $^1\text{H}$  and  $^{13}\text{C}$  NMR spectra of compound **14** [500 MHz for  $^1\text{H}$  and 125 MHz for  $^{13}\text{C}$ ,  $\text{CDCl}_3$ ].

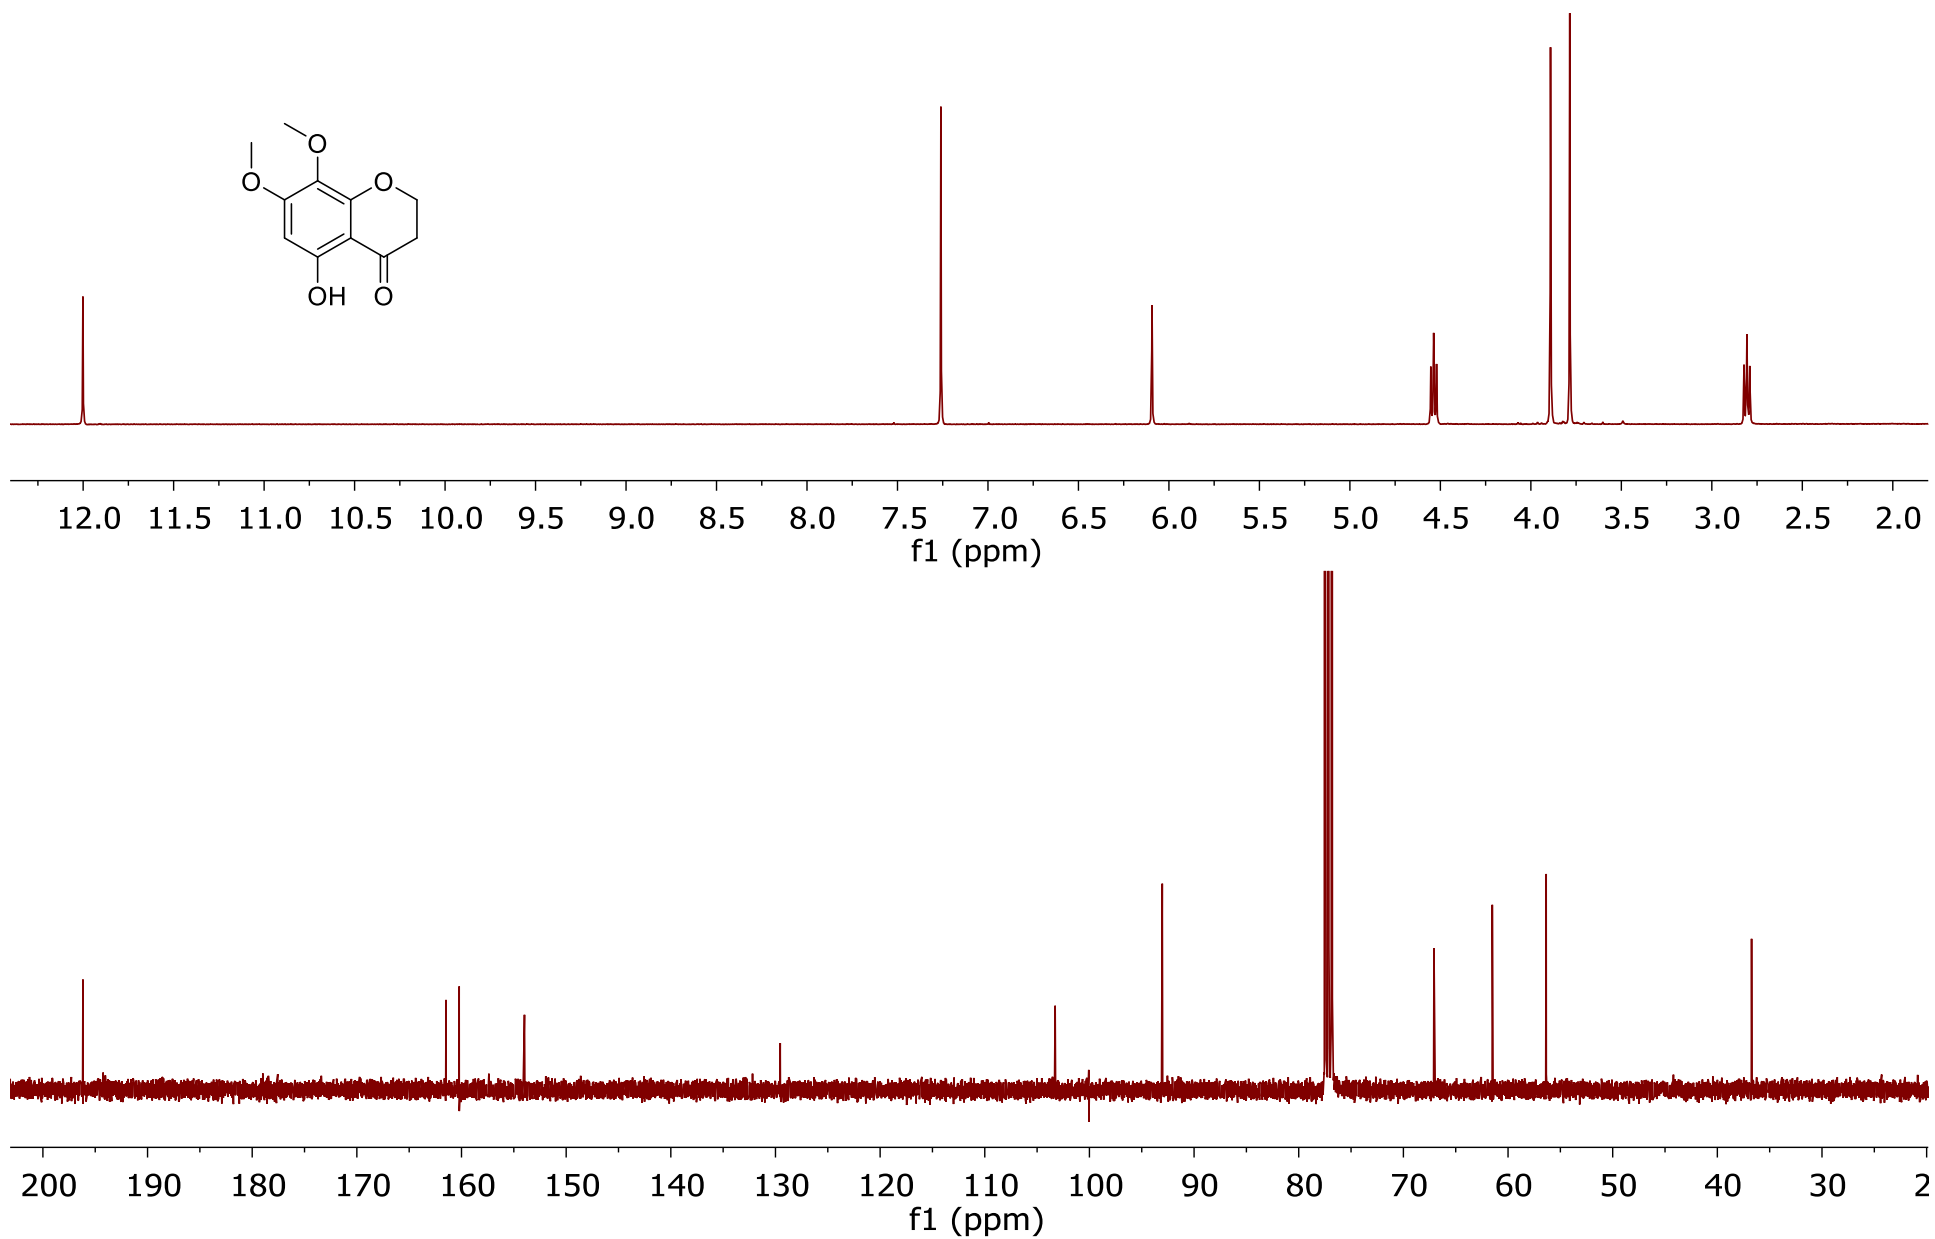

**Figure S15.**  $^1\text{H}$  and  $^{13}\text{C}$  NMR spectra of compound **15** [400 MHz for  $^1\text{H}$  and 100 MHz for  $^{13}\text{C}$ ,  $\text{CDCl}_3$ ].



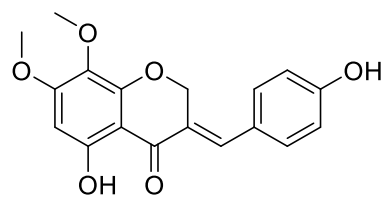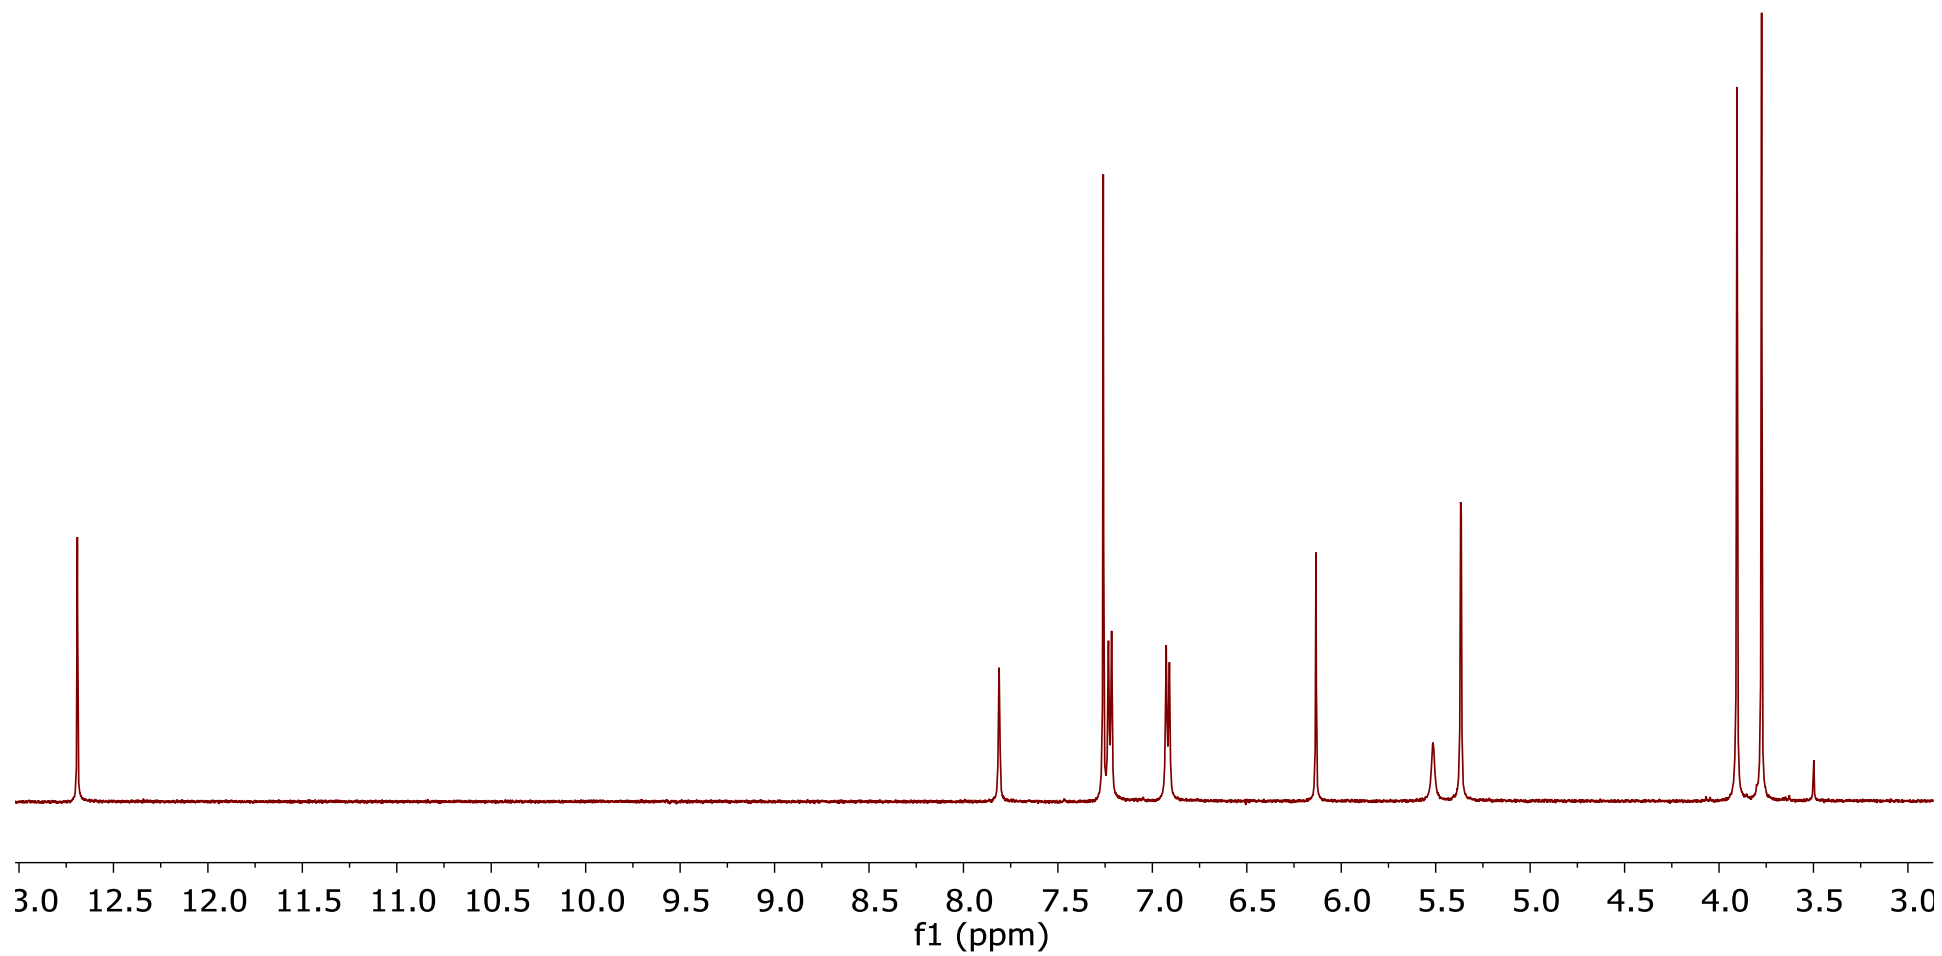

**Figure S16.** <sup>1</sup>H NMR spectrum of compound **16** [500 MHz, CDCl<sub>3</sub>].

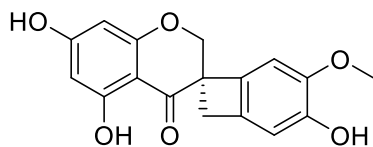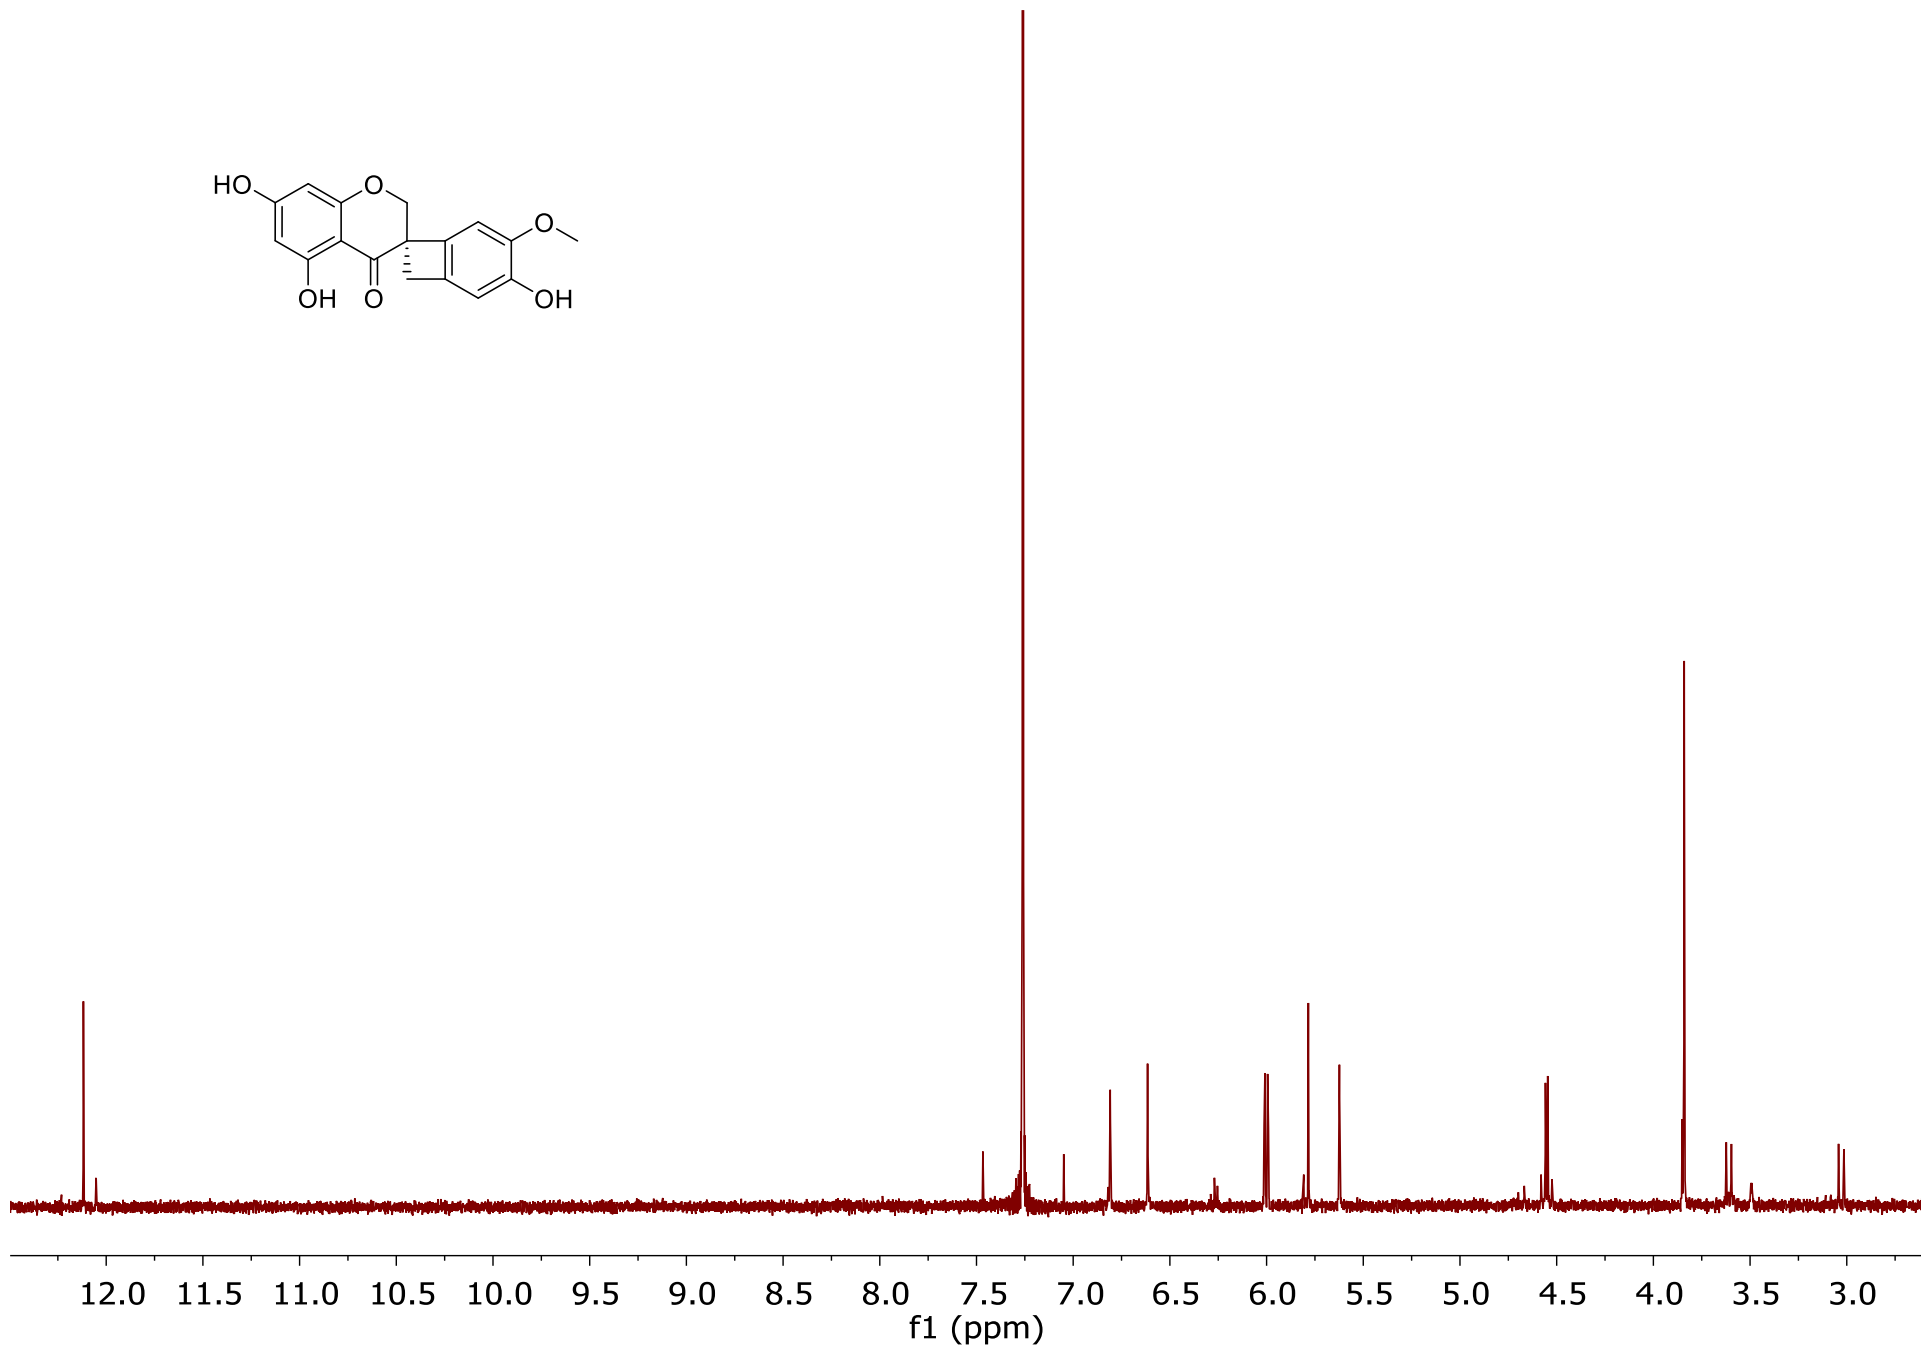

**Figure S17.** <sup>1</sup>H NMR spectrum of compound 17 [500 MHz, CDCl<sub>3</sub>].

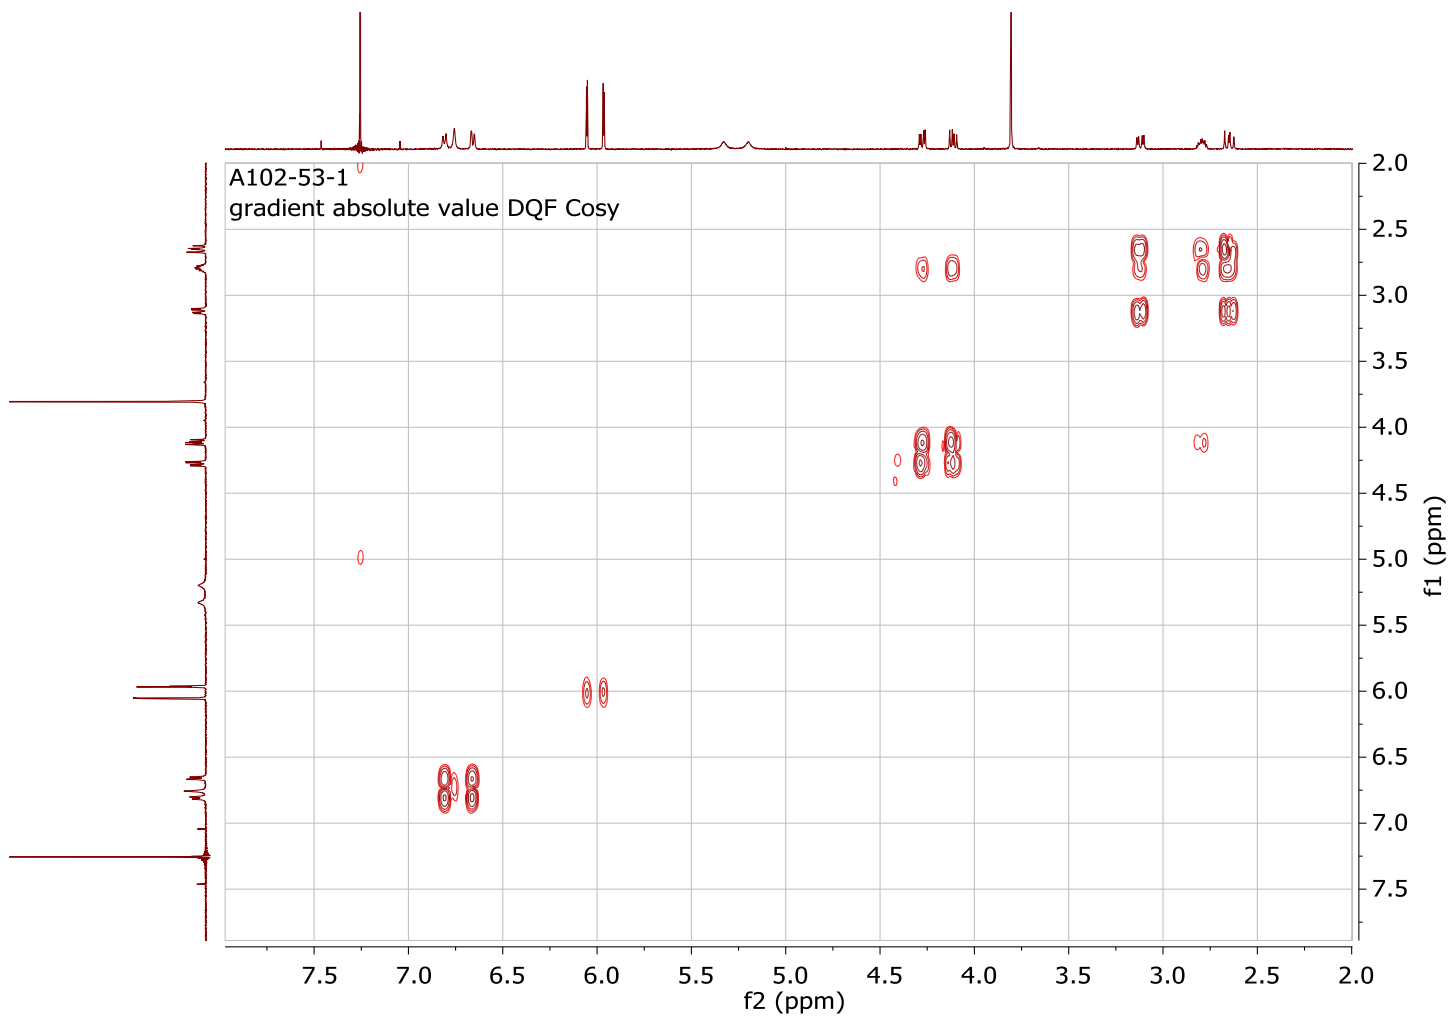

**Figure S18.**  $^1\text{H}$ - $^1\text{H}$  DQF COSY NMR spectrum of compound **4** [500 MHz,  $\text{CDCl}_3$ ].

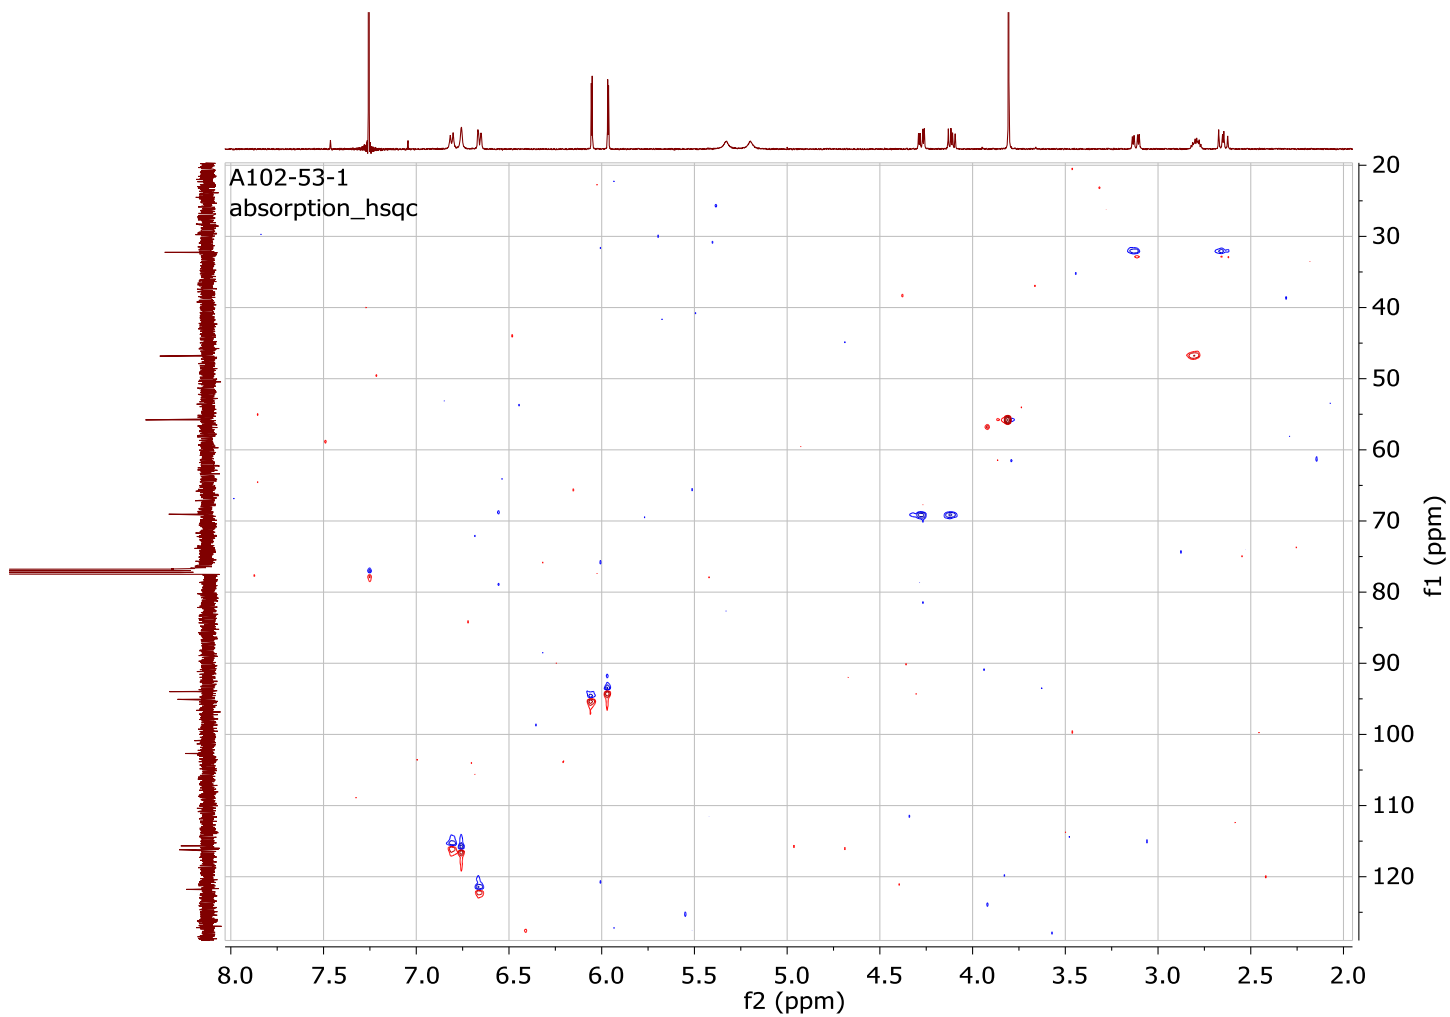

**Figure S19.**  $^1\text{H}$ - $^{13}\text{C}$  Edited-HSQC NMR spectrum of compound **4** [500 MHz,  $\text{CDCl}_3$ ].

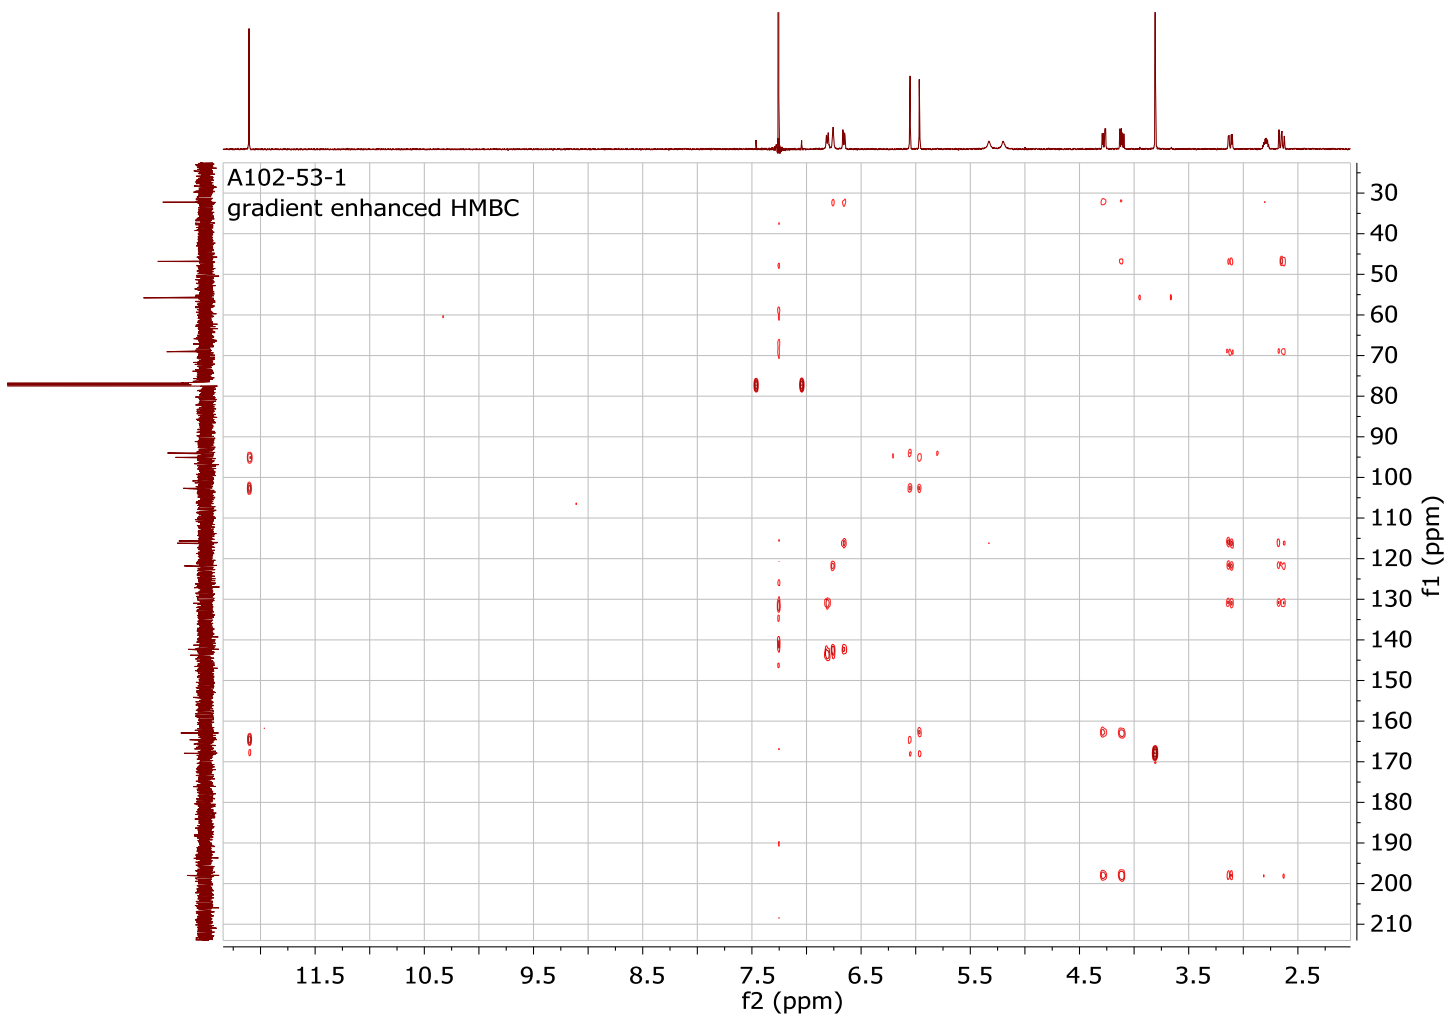

**Figure S20.**  $^1\text{H}$ - $^{13}\text{C}$  HMBC NMR spectrum of compound **4** [500 MHz,  $\text{CDCl}_3$ ].

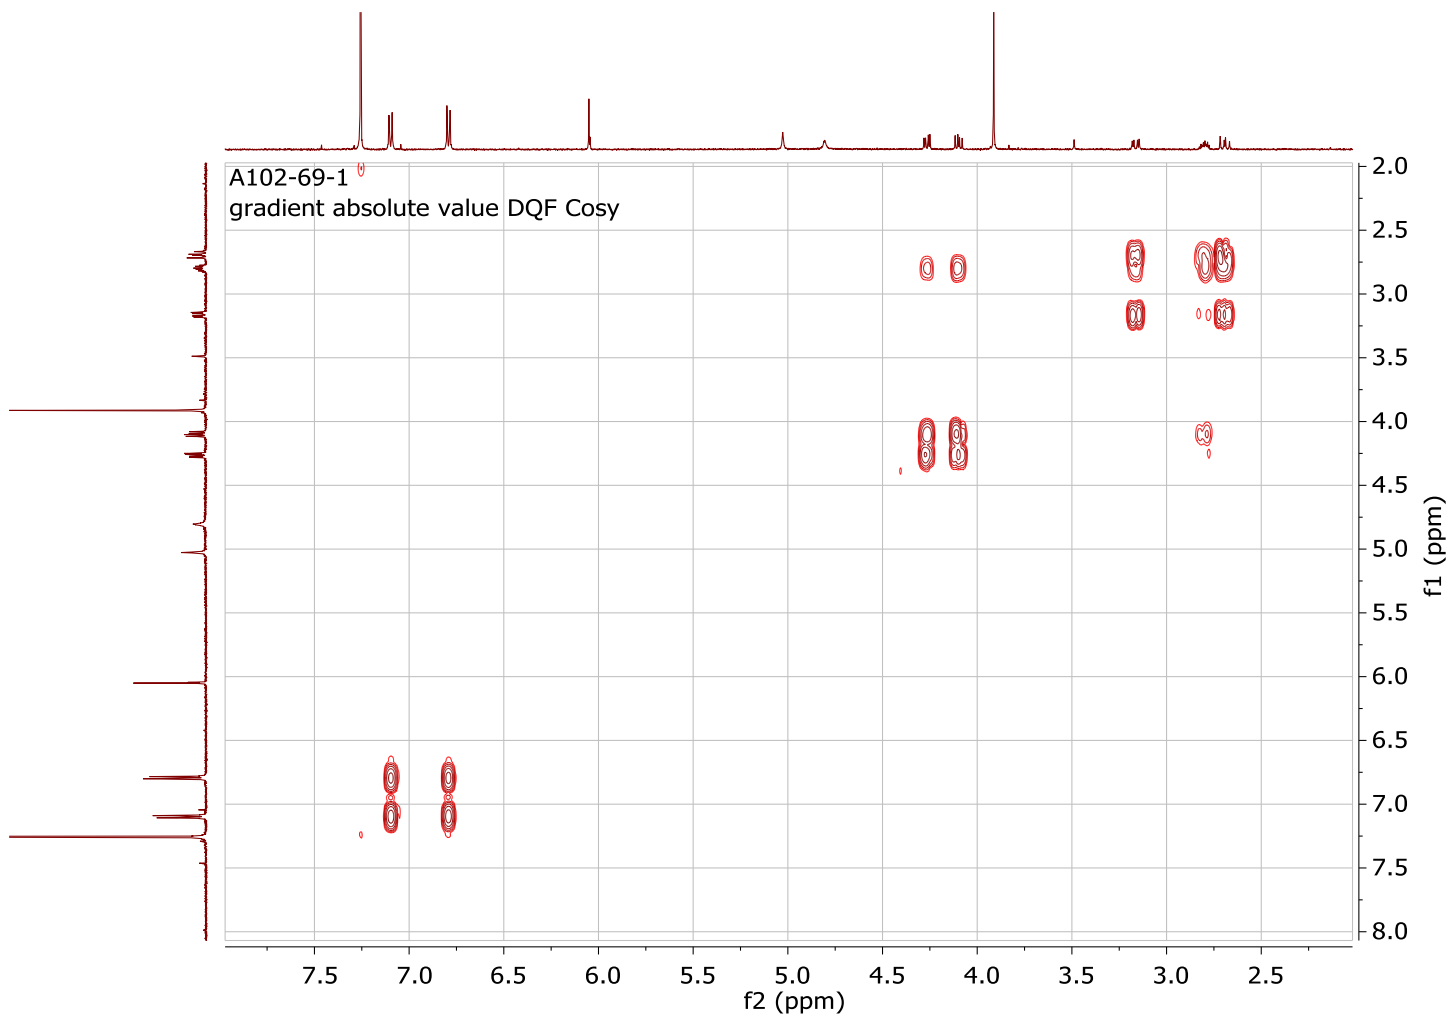

**Figure S21.**  $^1\text{H}$ - $^1\text{H}$  DQF COSY NMR spectrum of compound **8** [500 MHz,  $\text{CDCl}_3$ ].

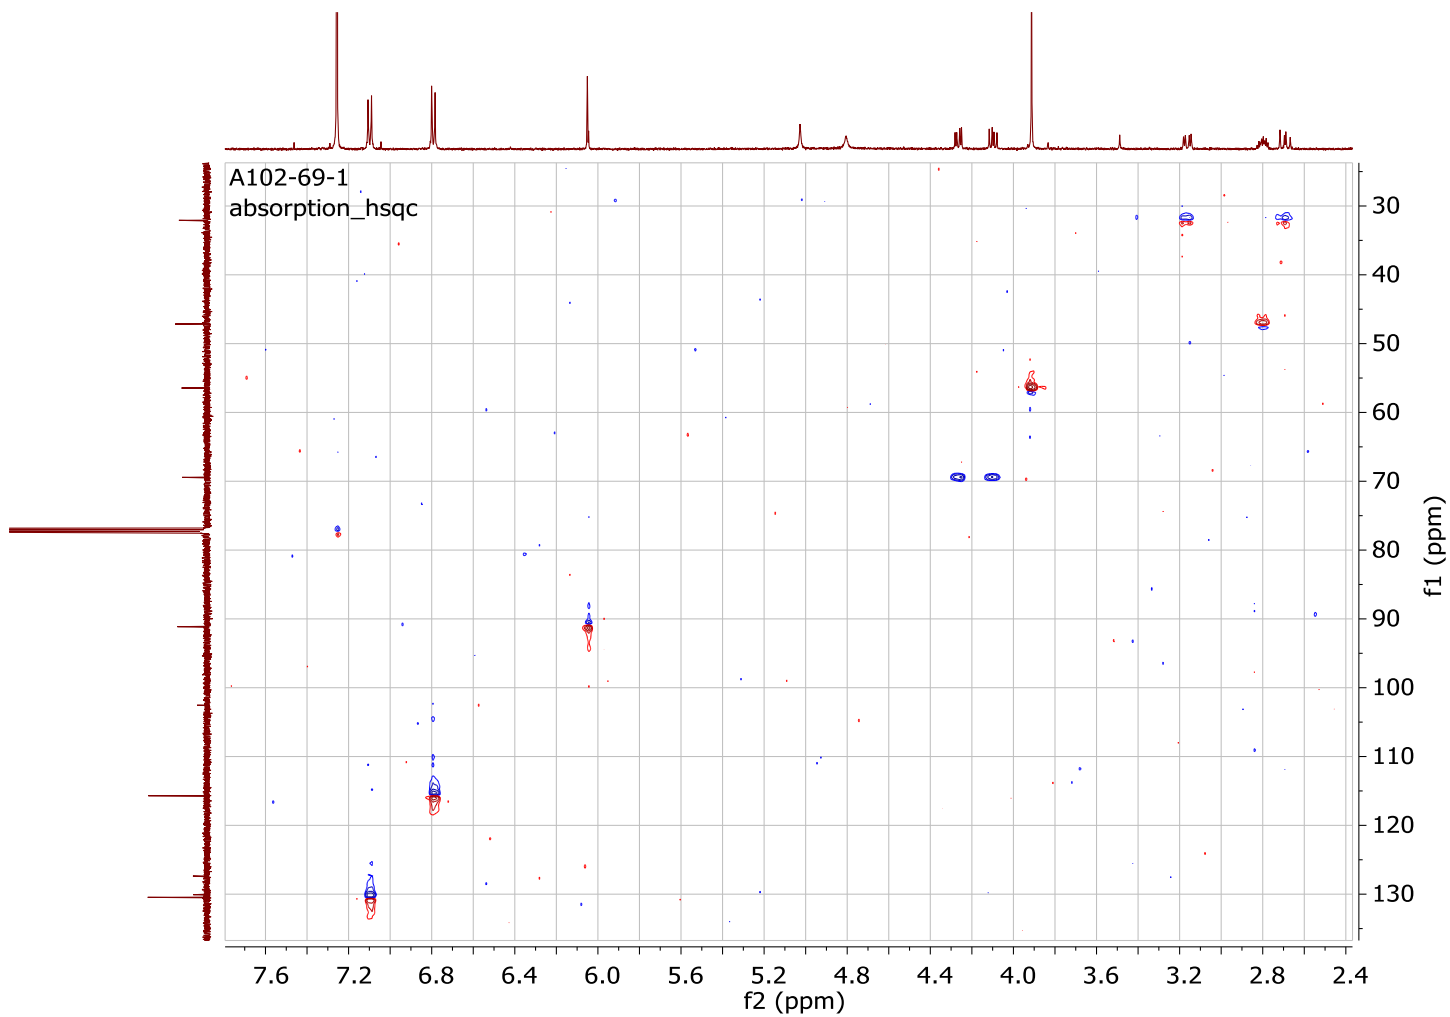

**Figure S22.**  $^1\text{H}$ - $^{13}\text{C}$  Edited-HSQC NMR spectrum of compound **8** [500 MHz,  $\text{CDCl}_3$ ].

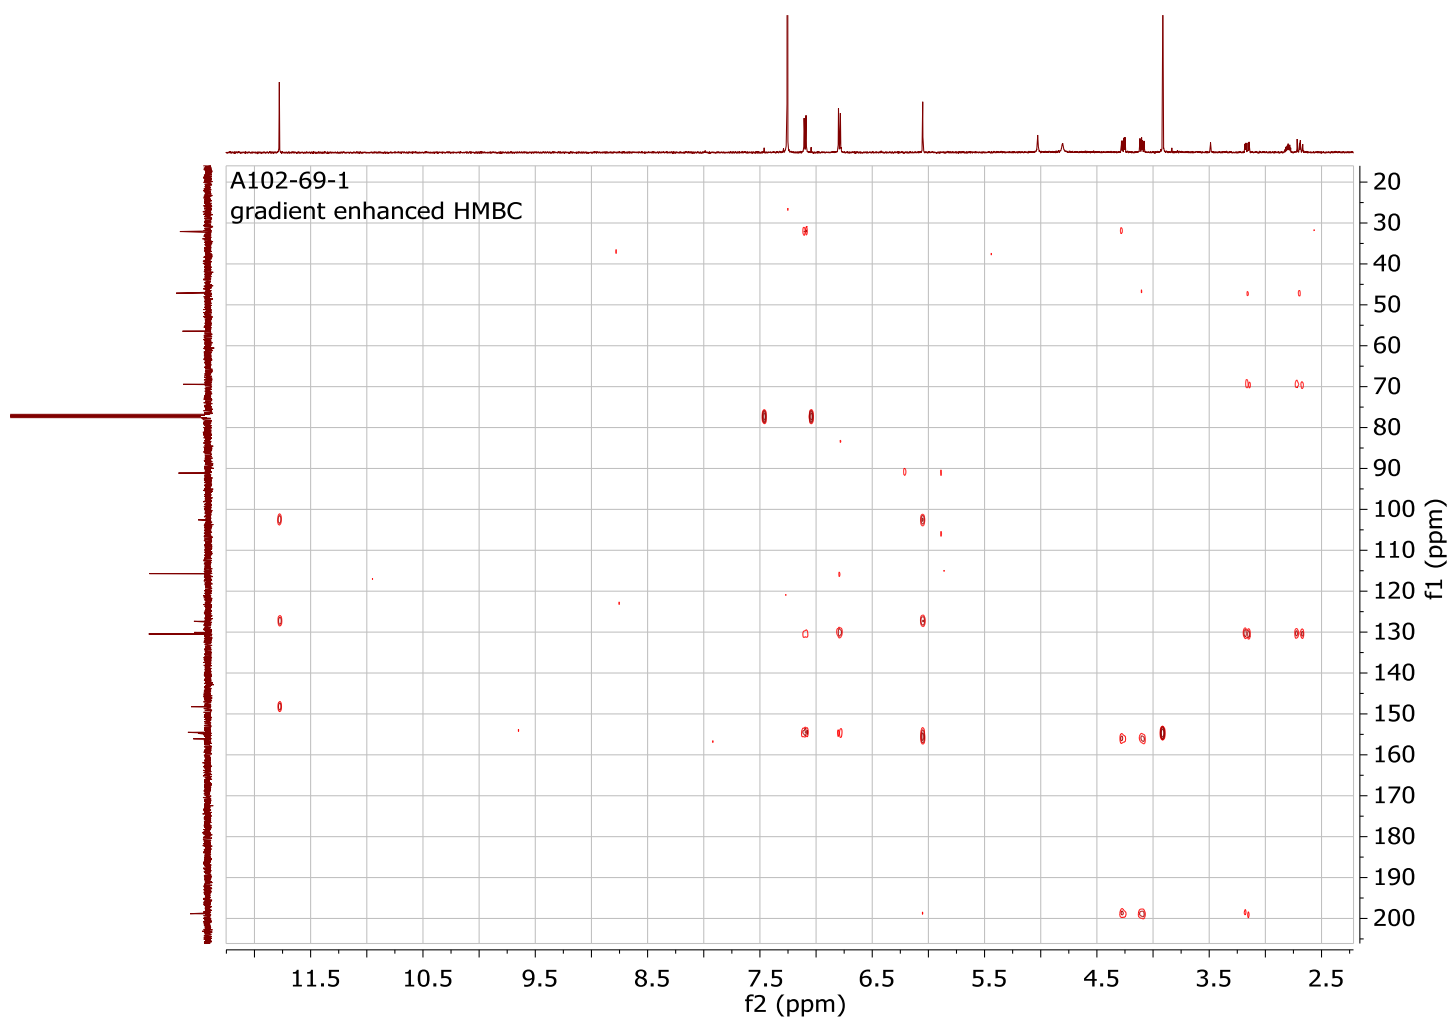

**Figure S23.**  $^1\text{H}$ - $^{13}\text{C}$  HMBC NMR spectrum of compound **8** [500 MHz,  $\text{CDCl}_3$ ].



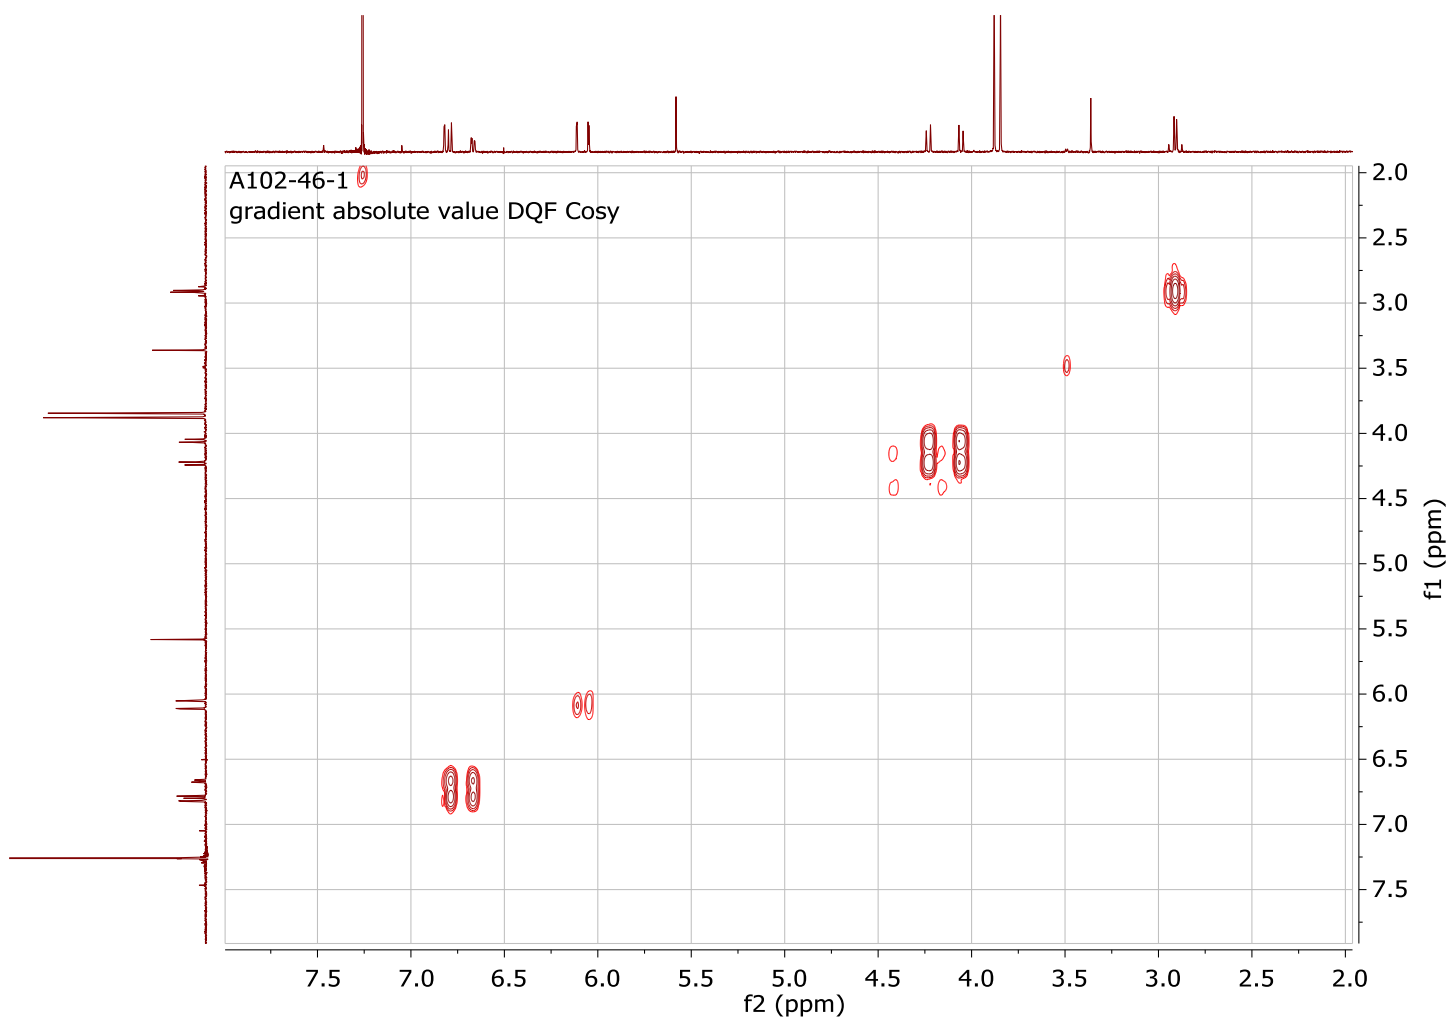

**Figure S24.**  $^1\text{H}$ - $^1\text{H}$  DQF COSY NMR spectrum of compound **13** [500 MHz,  $\text{CDCl}_3$ ].

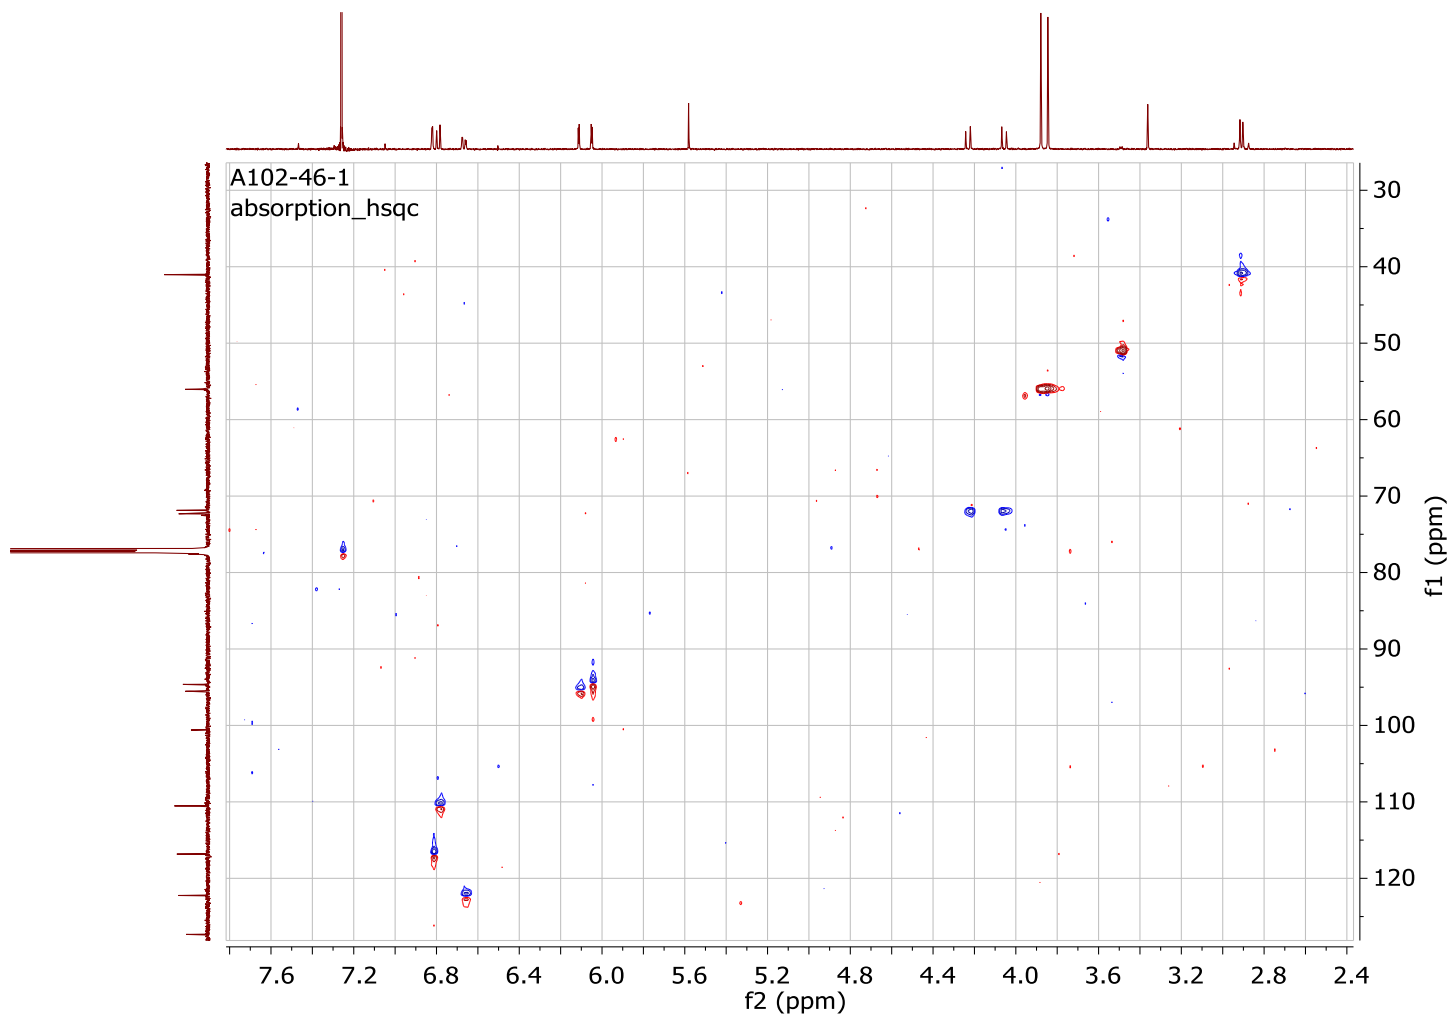

**Figure S25.**  $^1\text{H}$ - $^{13}\text{C}$  Edited-HSQC NMR spectrum of compound **13** [500 MHz,  $\text{CDCl}_3$ ].

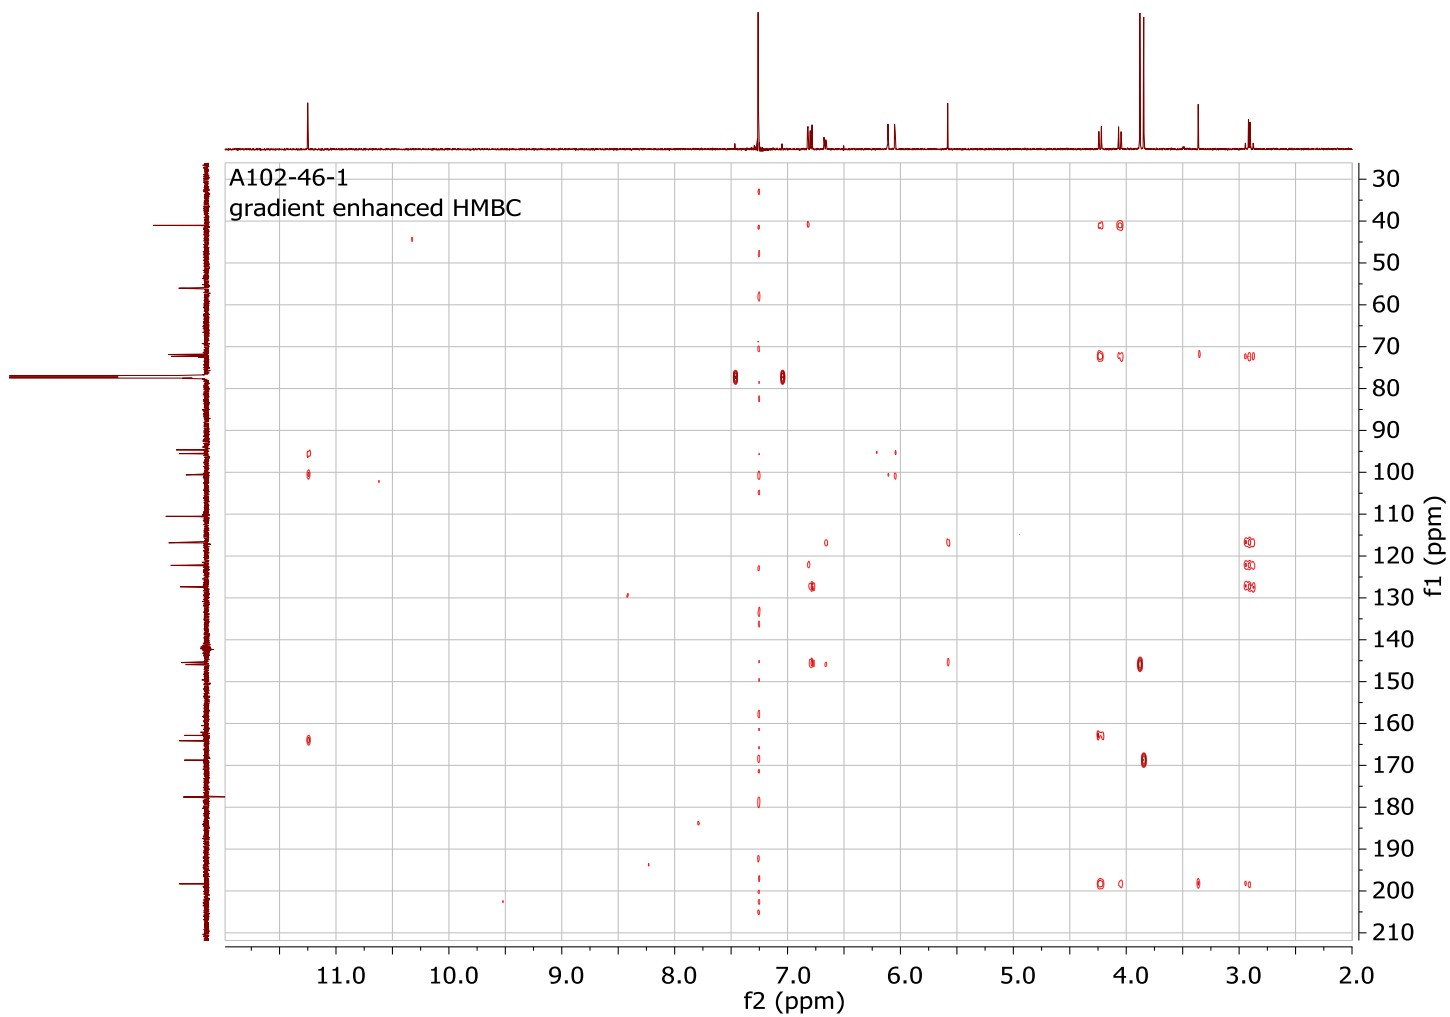

**Figure S26.**  $^1\text{H}$ - $^{13}\text{C}$  HMBC NMR spectrum of compound **13** [500 MHz,  $\text{CDCl}_3$ ].

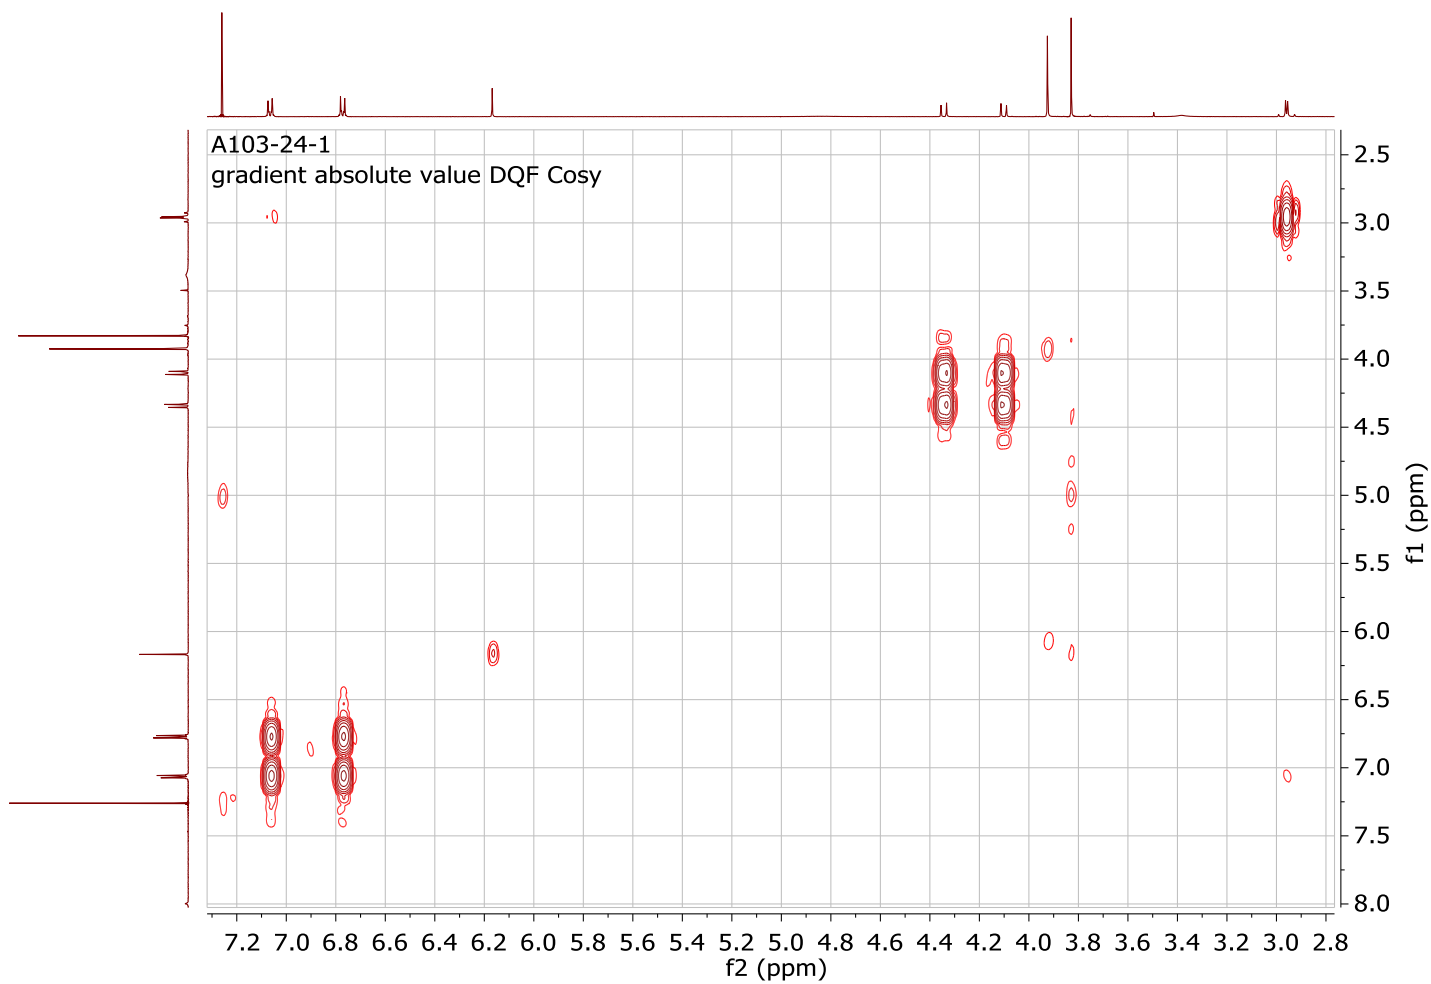

**Figure S27.**  $^1\text{H}$ - $^1\text{H}$  DQF COSY NMR spectrum of compound **14** [500 MHz,  $\text{CDCl}_3$ ].

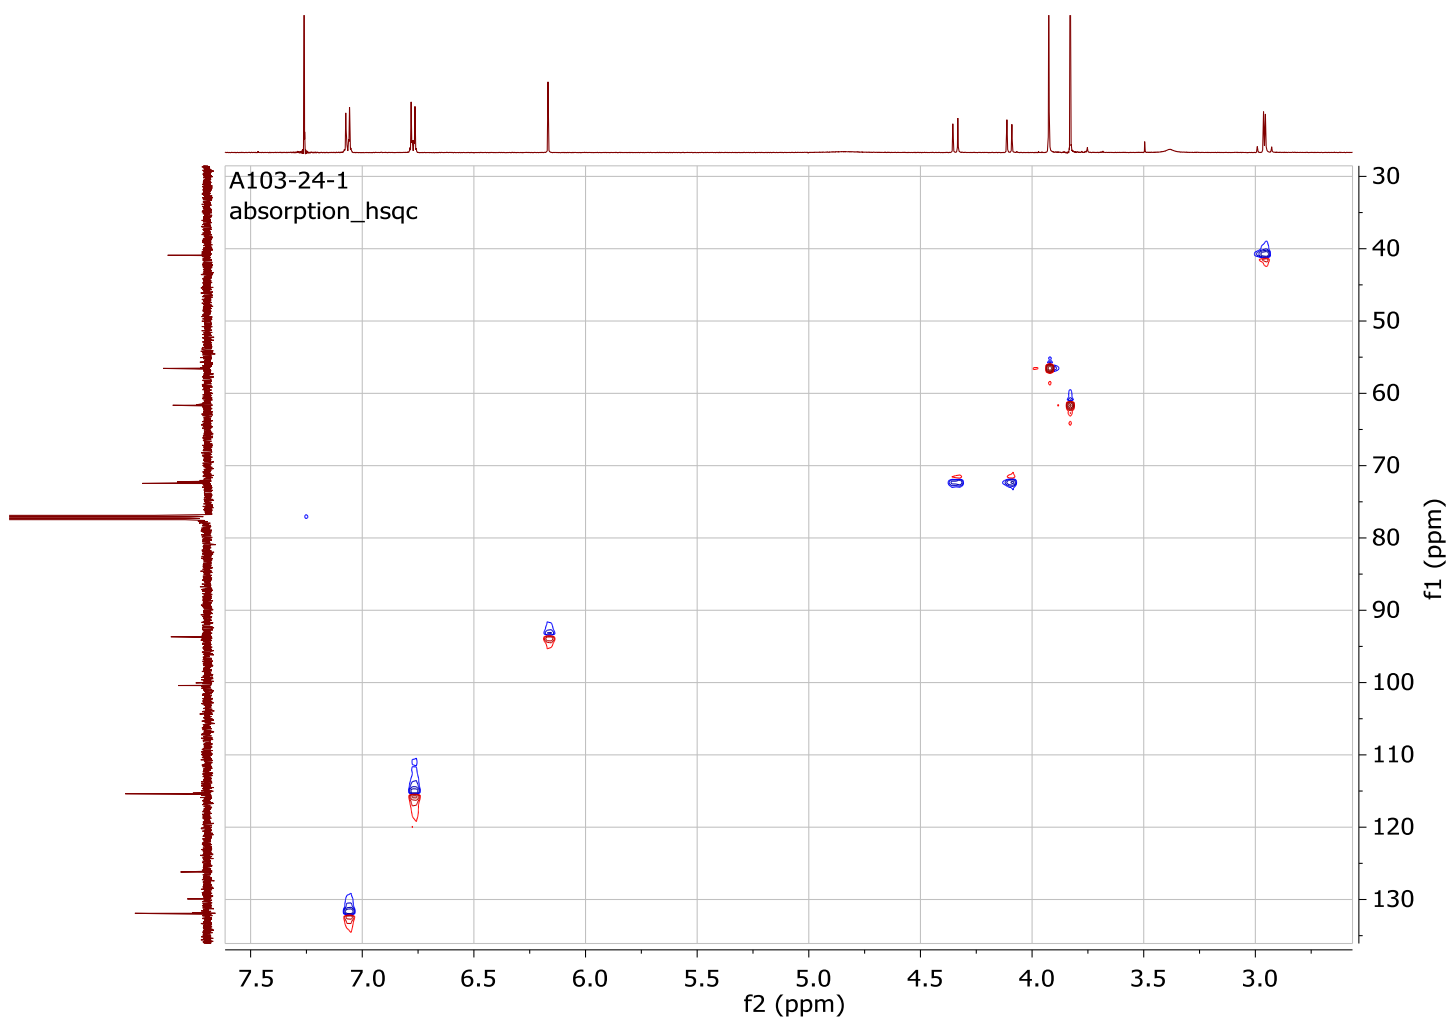

**Figure S28.**  $^1\text{H}$ - $^{13}\text{C}$  Edited-HSQC NMR spectrum of compound **14** [500 MHz,  $\text{CDCl}_3$ ].

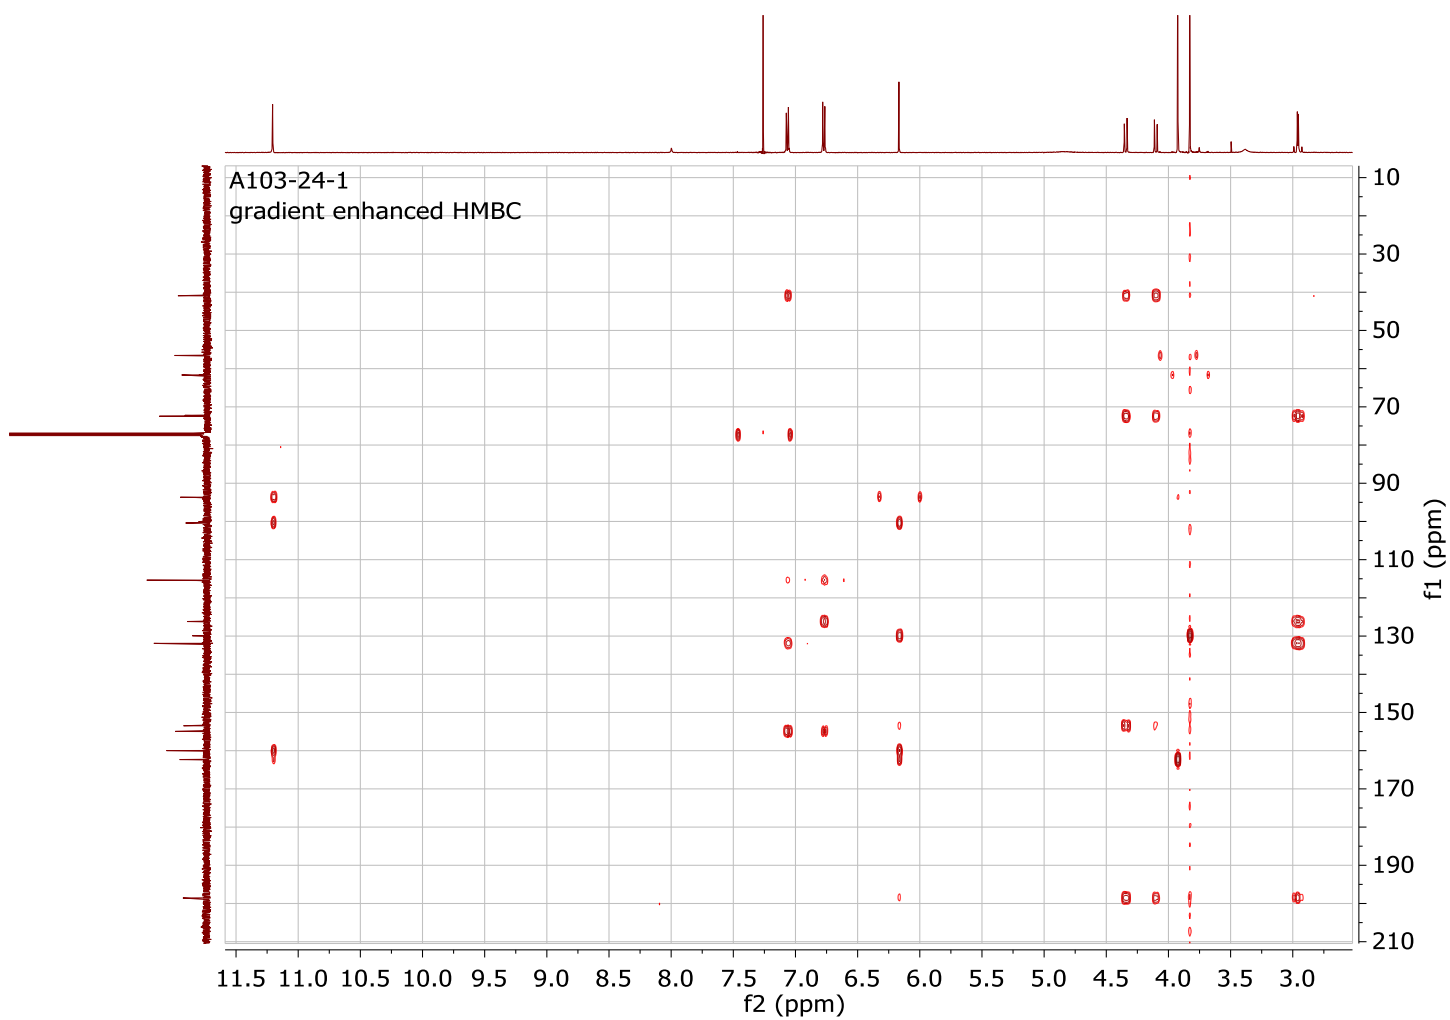

**Figure S29.**  $^1\text{H}$ - $^{13}\text{C}$  HMBC NMR spectrum of compound **14** [500 MHz,  $\text{CDCl}_3$ ].
